# Supplementary material
Source: publisher figshare collection journal article supplement (https://acs.figshare.com/ndownloader/files/10194753)
Supplement: Supplementary file 1 [file 10194753]

**Supporting Information for "Drastic Redox Shift and Electronic Structural Changes of a Manganese(III) Salen Oxidation Catalyst upon Reaction with Hydroxide and Cyanide Ion"**

Takuya Kurahashi\*

*Institute for Molecular Science, National Institutes of Natural Sciences, Myodaiji, Okazaki, Aichi 444-8787, Japan*

Content:

|                                                                                                                                                                       |           |
|-----------------------------------------------------------------------------------------------------------------------------------------------------------------------|-----------|
| Materials .....                                                                                                                                                       | S2        |
| Preparations of Manganese(III) Salen Complexes .....                                                                                                                  | S2        |
| Preparations of $[\text{Mn}^{\text{III}}(\text{salen})(\text{X})_2]^-$ ( $\text{X} = \text{CN}^-$ , $\text{OH}^-$ , $\text{CH}_3\text{O}^-$ ) .....                   | S9        |
| Assignments of the Resonance Raman Bands from $\text{Mn}^{\text{III}}(\text{salen})(\text{OTf})$ and $[\text{Mn}^{\text{III}}(\text{salen})(\text{CN})_2]^-$ ....     | S10       |
| Assignments of the $^1\text{H}$ NMR Signals from $\text{Mn}^{\text{III}}(\text{salen})(\text{OTf})$ and $[\text{Mn}^{\text{III}}(\text{salen})(\text{CN})_2]^-$ ..... | S15       |
| Magnetic Susceptibility Measurements by Evans Method .....                                                                                                            | S20       |
| References .....                                                                                                                                                      | S24       |
| Figures S11 – S24 .....                                                                                                                                               | S25 – S39 |

## Materials.

CD<sub>3</sub>CN was purchased from Cambridge Isotope Laboratories. Electrochemical-grade and anhydrous CH<sub>3</sub>CN were purchased from Kanto. CH<sub>3</sub>CH<sub>2</sub>CN ( $\geq 99\%$ ) was purchased from Aldrich. Other solvents were purchased from Kanto or Wako, and were used as received. Bu<sub>4</sub>NCN, Bu<sub>4</sub>NOH·(H<sub>2</sub>O)<sub>30</sub>, Bu<sub>4</sub>NOMe in MeOH and Bu<sub>4</sub>NOTf were purchased from Aldrich. Bu<sub>4</sub>NOH·(H<sub>2</sub>O)<sub>30</sub> was dried in vacuo at room temperature for 3 h just before use. 3-*tert*-Butyl-salicylaldehyde was purchased from Aldrich. 3-, 4- and 5-Methylsalicylaldehydes and salicylaldehyde were purchased from TCI. 6-Methylsalicylaldehyde was prepared from 2,3-dimethylanisole according to the literature.<sup>1</sup> 1-(3,5-Di-*tert*-Butyl-2-hydroxyphenyl)ethanone was prepared by ortho-acetylation of 3,5-di-*tert*-butylphenol according to the literature.<sup>2</sup> Ferrocenium triflate was prepared by the oxidation of ferrocene with 1 equiv. of AgOTf according to the literature.<sup>3</sup> The preparations of Mn<sup>III</sup>(L-OMe)(OTf), Mn<sup>III</sup>(L-*t*-Bu)(OTf) and Mn<sup>III</sup>(L-Cl)(OTf) were reported previously.<sup>4</sup> The preparations of selectively deuterated salen ligands (L-*t*-Bu-*d*<sub>2</sub> and L-*t*-Bu-*d*<sub>4</sub>) were reported previously.<sup>4, 5</sup> 3-*tert*-Butyl-5-nitrosalicylaldehyde was prepared by nitration of 3-*tert*-butyl-salicylaldehyde according to the literature.<sup>6</sup>

## Preparations of Manganese(III) Complexes.

**Synthesis of L-NO<sub>2</sub>.** To the solution of 2 equiv. of 3-*tert*-butyl-5-nitrosalicylaldehyde (3.94 g, 17.7 mmol) in anhydrous EtOH (20 mL) was added the solution of (1*R*,2*R*)-1,2-diaminocyclohexane (1.01 g, 8.83 mmol) in anhydrous EtOH (5 mL). The resulting solution was heated to reflux at 100 °C for 2h. At room temperature, H<sub>2</sub>O (10 mL) was added to the EtOH solution to give the title compound (4.45 g, 8.34 mmol) in a 94% yield. <sup>1</sup>H NMR (400 MHz, CDCl<sub>3</sub>)  $\delta$  1.38 (s, 18H), 1.45–2.10 (m, 8H), 3.35–3.55 (m, 2H), 7.97 (d, *J* = 2.8 Hz, 2H), 8.13 (d, *J* = 2.8 Hz, 2H), 8.33 (s, 2H), 15.00 (s, 2H).

Anal. calcd for  $C_{28}H_{36}N_4O_6 \cdot (H_2O)_{0.5}$ : C, 63.02; H, 6.99; N, 10.50. Found: C, 63.29; H, 7.12; N, 10.48.

**Synthesis of  $Mn^{III}(L-NO_2)(OTf)$ .** The solution of L- $NO_2$  (1.00 g, 1.87 mmol) and 3 equiv. of  $Mn(OAc)_2 \cdot (H_2O)_4$  (1.41 g, 5.74 mmol) in anhydrous EtOH (10 mL) was heated to reflux at 100 °C for 2 h. After cooling, the solvent was removed by evaporation under reduced pressure. The residue was dissolved in acetone (20 mL), and an insoluble material was filtered off. Aqueous  $CF_3SO_3H$  solution (0.5 M, ~30 mL) was added to afford  $Mn^{III}(L-NO_2)(OTf)$  (660 mg, 0.87 mmol) as a precipitate in a 46% yield. Anal. calcd for  $C_{29}H_{34}F_3MnN_4O_9S \cdot (H_2O)_{1.8}$ : C, 45.89; H, 4.99; N, 7.38. Found: C, 45.87; H, 5.00; N, 7.26.

**Chart S1.**  $Mn^{III}(\text{salen})(OTf)$  complexes for the assignment of the  $^1H$  NMR signals of the H and Me groups.

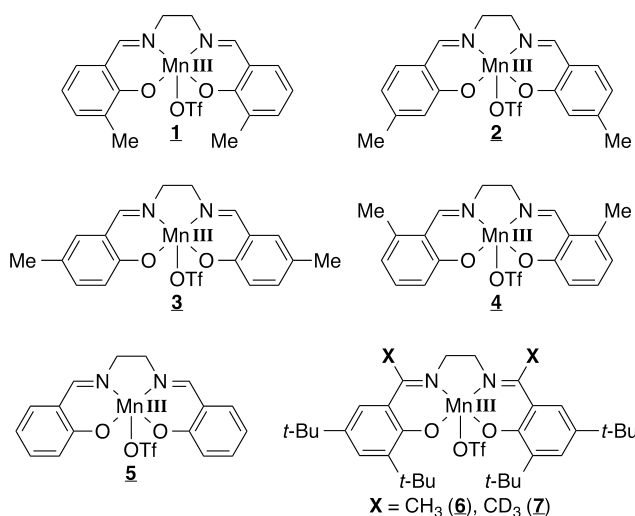

**Synthesis of 1.** To the solution of ethylenediamine (132.7 mg, 2.21 mmol) in EtOH (10 mL) was added 2 equiv. of 3-methylsalicylaldehyde (601.2 mg, 4.42 mmol). Heating at 120 °C gave a clear yellow solution. The resulting solution was heated to reflux at 120 °C for 1 h. Then, 4 equiv. of  $Et_3N$  (1.23 mL, 8.84 mmol) and 2 equiv. of  $Mn(OAc)_2 \cdot (H_2O)_4$  (1.08 g, 4.42 mmol) were successively added at room temperature. The mixture was heated to reflux at 120 °C for 2 h. After cooling, the solvent was removed by evaporation under reduced pressure. After drying in vacuo, the residue was

dissolved in  $\text{CH}_2\text{Cl}_2$  (40 mL) and  $\text{CH}_3\text{OH}$  (10 mL), and the organic layer was washed with saturated  $\text{NaHCO}_3$  aqueous solution (30 mL). The solvent was removed by evaporation under reduced pressure. After drying in vacuo, the residue was dissolved in  $\text{CH}_2\text{Cl}_2$  (40 mL) and  $\text{CH}_3\text{OH}$  (10 mL), and the organic layer was then washed with aqueous  $\text{CF}_3\text{SO}_3\text{H}$  solution (0.5 M, 30 mL). The solvent was removed by evaporation under reduced pressure. After drying in vacuo, the residue dissolved in  $\text{CH}_2\text{Cl}_2$  (5 mL) and a minimum amount of  $\text{CH}_3\text{OH}$  was passed through a membrane filter (Millex-FG, pore size 0.45  $\mu\text{m}$ , diameter 13 mm, Millipore). The product was purified by precipitation in acetone (10 mL) and hexane (10 mL), and was dried in vacuo at 80  $^\circ\text{C}$  for 12 h. **1** (517.1 mg, 1.04 mmol) was obtained in a 47% yield. Anal. calcd for  $\text{C}_{19}\text{H}_{18}\text{F}_3\text{MnN}_2\text{O}_5\text{S}$ : C, 45.79; H, 3.64; N, 5.62. Found: C, 45.93; H, 3.79; N, 5.61.

**Synthesis of 2.** To the solution of ethylenediamine (134.4 mg, 2.24 mmol) in EtOH (15 mL) was added 2 equiv. of 4-methylsalicylaldehyde (608.9 mg, 4.47 mmol). The resulting suspension was heated to reflux at 120  $^\circ\text{C}$  for 1 h. Then, 4 equiv. of  $\text{Et}_3\text{N}$  (1.25 mL, 8.96 mmol) and 2 equiv. of  $\text{Mn}(\text{OAc})_2 \cdot (\text{H}_2\text{O})_4$  (1.10 g, 4.48 mmol) were successively added at room temperature. The mixture was heated to reflux at 120  $^\circ\text{C}$  for 2 h. After cooling, the solvent was removed by evaporation under reduced pressure. After drying in vacuo, the residue was dissolved in  $\text{CH}_2\text{Cl}_2$  (40 mL) and  $\text{CH}_3\text{OH}$  (6 mL), and the organic layer was washed with saturated  $\text{NaHCO}_3$  aqueous solution (30 mL  $\times$  2). The solvent was removed by evaporation under reduced pressure. After drying in vacuo, the residue was dissolved in  $\text{CH}_2\text{Cl}_2$  (40 mL) and  $\text{CH}_3\text{OH}$  (10 mL), and the organic layer was then washed with aqueous  $\text{CF}_3\text{SO}_3\text{H}$  solution (0.5 M, 30 mL). The solvent was removed by evaporation under reduced pressure. After drying in vacuo, the residue dissolved in  $\text{CH}_2\text{Cl}_2$  (5 mL) and  $\text{CH}_3\text{OH}$  (0.5 mL) was passed through a membrane filter (Millex-FG, pore size 0.45  $\mu\text{m}$ , diameter 13 mm, Millipore). The product was purified by precipitation in acetone (10 mL) and hexane (8 mL), and was dried in vacuo at 80  $^\circ\text{C}$

for 12 h. **2** (213.9 mg, 0.41 mmol) was obtained in a 18% yield. Anal. calcd for  $C_{19}H_{18}F_3MnN_2O_5S(H_2O)_{1.3}$ : C, 43.74; H, 3.98; N, 5.37. Found: C, 43.70; H, 3.89; N, 5.35.

**Synthesis of 3.** To the solution of ethylenediamine (132.3 mg, 2.20 mmol) in EtOH (10 mL) was added 2 equiv. of 5-methylsalicylaldehyde (599.4 mg, 4.40 mmol). The resulting suspension was heated to reflux at 120 °C for 1 h. Then, 4 equiv. of  $Et_3N$  (1.23 mL, 8.80 mmol) and 2 equiv. of  $Mn(OAc)_2 \cdot (H_2O)_4$  (1.08 g, 4.40 mmol) were successively added at room temperature. The mixture was heated to reflux at 120 °C for 2 h. After cooling, the solvent was removed by evaporation under reduced pressure. After drying in vacuo, the residue was dissolved in  $CH_2Cl_2$  (40 mL) and  $CH_3OH$  (6 mL), and the organic layer was washed with saturated  $NaHCO_3$  aqueous solution (30 mL  $\times$  2). The solvent was removed by evaporation under reduced pressure. After drying in vacuo, the residue was dissolved in  $CH_2Cl_2$  (40 mL) and  $CH_3OH$  (10 mL), and the organic layer was then washed with aqueous  $CF_3SO_3H$  solution (0.5 M, 30 mL  $\times$  2). The solvent was removed by evaporation under reduced pressure. After drying in vacuo, the residue dissolved in  $CH_2Cl_2$  (5 mL) and  $CH_3OH$  (0.5 mL) was passed through a membrane filter (Millex-FG, pore size 0.45  $\mu m$ , diameter 13 mm, Millipore). The product was purified by precipitation in acetone (10 mL) and hexane (10 mL), and was dried in vacuo at 80 °C for 12 h. **3** (230.0 mg, 0.45 mmol) was obtained in a 21% yield. Anal. calcd for  $C_{19}H_{18}F_3MnN_2O_5S(H_2O)_{0.5}$ : C, 44.98; H, 3.77; N, 5.52. Found: C, 44.90; H, 3.83; N, 5.48.

**Synthesis of 4.** To the solution of ethylenediamine (27.2 mg, 0.45 mmol) in EtOH (3 mL) was added 2 equiv. of 6-methylsalicylaldehyde (123.1 mg, 0.90 mmol). Heating at 120 °C gave a clear yellow solution. The resulting solution was heated to reflux at 120 °C for 1 h. Then, 4 equiv. of  $Et_3N$  (0.25 mL, 1.82 mmol) and 2 equiv. of  $Mn(OAc)_2 \cdot (H_2O)_4$  (222 mg, 0.91 mmol) were successively added at room temperature. The mixture was heated to reflux at 120 °C for 2 h. After cooling, the solvent was removed by evaporation under reduced pressure. After drying in vacuo, the residue was

dissolved in  $\text{CH}_2\text{Cl}_2$  (40 mL) and  $\text{CH}_3\text{OH}$  (10 mL), and the organic layer was washed with saturated  $\text{NaHCO}_3$  aqueous solution (30 mL  $\times$  2). The solvent was removed by evaporation under reduced pressure. After drying in vacuo, the residue was dissolved in  $\text{CH}_2\text{Cl}_2$  (40 mL) and  $\text{CH}_3\text{OH}$  (10 mL), and the organic layer was then washed with aqueous  $\text{CF}_3\text{SO}_3\text{H}$  solution (0.5 M, 30 mL  $\times$  2). The solvent was removed by evaporation under reduced pressure. After drying in vacuo, the residue dissolved in acetone (5 mL) was passed through a membrane filter (Millex-FG, pore size 0.45  $\mu\text{m}$ , diameter 13 mm, Millipore). Precipitation in acetone (4 mL) and hexane (6 mL) gave the powder, which was obtained by centrifugation and decantation. The product was dried in vacuo at 80  $^\circ\text{C}$  for 12 h. **4** (19.7 mg, 0.038 mmol) was obtained in a 8% yield. Anal. calcd for  $\text{C}_{19}\text{H}_{18}\text{F}_3\text{MnN}_2\text{O}_5\text{S}$  ( $\text{H}_2\text{O}$ ): C, 44.19; H, 3.90; N, 5.43. Found: C, 44.15; H, 3.91; N, 5.33.

**Synthesis of 5.** To the solution of ethylenediamine (126.8 mg, 2.11 mmol) in EtOH (5 mL) was added 2 equiv. of salicylaldehyde (515.3 mg, 4.22 mmol). Heating at 120  $^\circ\text{C}$  gave a clear yellow solution. The resulting solution was heated to reflux at 120  $^\circ\text{C}$  for 1 h. Then, 4 equiv. of  $\text{Et}_3\text{N}$  (1.18 mL, 8.44 mmol) and 2 equiv. of  $\text{Mn}(\text{OAc})_2 \cdot (\text{H}_2\text{O})_4$  (1.03 g, 4.22 mmol) were successively added at room temperature. The mixture was heated to reflux at 120  $^\circ\text{C}$  for 2 h. After cooling, the solvent was removed by evaporation under reduced pressure. After drying in vacuo, the residue was dissolved in  $\text{CH}_2\text{Cl}_2$  (30 mL) and  $\text{CH}_3\text{OH}$  (15 mL), and the organic layer was washed with saturated  $\text{NaHCO}_3$  aqueous solution (30 mL). The solvent was removed by evaporation under reduced pressure. After drying in vacuo, the residue was dissolved in  $\text{CH}_2\text{Cl}_2$  (40 mL) and  $\text{CH}_3\text{OH}$  (10 mL), and the organic layer was then washed with aqueous  $\text{CF}_3\text{SO}_3\text{H}$  solution (0.5 M, 30 mL). The solvent was removed by evaporation under reduced pressure. After drying in vacuo, the residue dissolved in  $\text{CH}_2\text{Cl}_2$  (5 mL) was passed through a membrane filter (Millex-FG, pore size 0.45  $\mu\text{m}$ , diameter 13 mm, Millipore). The product was purified by precipitation in acetone (10 mL) and hexane (10 mL), and

was dried in vacuo at 80 °C for 12 h. **5** (142.5 mg, 0.30 mmol) was obtained in a 14% yield. Anal. calcd for  $C_{17}H_{14}F_3MnN_2O_5S$ : C, 43.42; H, 3.00; N, 5.96. Found: C, 43.60; H, 3.37; N, 5.72.

**Synthesis of 6.** To the solution of ethylenediamine (246 mg, 4.09 mmol) in EtOH (10 mL) was added 2 equiv. of 1-(3,5-di-*tert*-butyl-2-hydroxyphenyl)ethanone (2.03 g, 8.17 mmol) in EtOH (10 mL). The resulting solution was heated to reflux at 120 °C for 7 h. After cooling, the solution was concentrated under reduced pressure to the volume of 10 mL. Standing the solution at –20 °C gave the metal-free ligand as a yellow precipitate. After drying in vacuo at 100 °C for 12h, the product (800.2 mg, 1.54 mmol) was obtained in a 38% yield.  $^1H$  NMR (400 MHz,  $CDCl_3$ )  $\delta$  1.28 (s, 18H), 1.41 (s, 18H), 2.40 (s, 6H), 3.97 (s, 4H), 7.35 (d,  $J$  = 2.8 Hz, 2H), 7.38 (d,  $J$  = 2.8 Hz, 2H). Anal. calcd for  $C_{34}H_{52}N_2O_2 \cdot (H_2O)_{0.1}$ : C, 78.14; H, 10.07; N, 5.36. Found: C, 78.12; H, 10.04; N, 5.40.

To the solution of the metal-free ligand (100 mg, 0.19 mmol) dissolved in EtOH (2 mL) and  $Et_3N$  (0.54 mL, 3.89 mmol) was added 2 equiv. of  $Mn(OAc)_2 \cdot (H_2O)_4$  (94.1 mg, 0.38 mmol). The resulting solution was heated to reflux at 120 °C for 3 h. After cooling, the solvent was removed under reduced pressure, and the residue was dried in vacuo. The residue dissolved in toluene (20 mL) was washed with saturated  $NaHCO_3$  aqueous solution (20 mL). The solvent was removed under reduced pressure. After drying in vacuo, the residue dissolved in  $CH_2Cl_2$  (20 mL) was washed with aqueous  $CF_3SO_3H$  solution (0.5 M, 20 mL  $\times$  3). The solvent was removed under reduced pressure, and the residue was dried in vacuo. The residue dissolved in  $CH_2Cl_2$  (5 mL) was passed through a membrane filter (Millex-FG, pore size 0.45  $\mu m$ , diameter 13 mm, Millipore). The product was purified by precipitation in hot hexane (20 mL), and was dried in vacuo at 100 °C for 12 h. **6** (88.9 mg, 0.12 mmol) was obtained in a 63% yield. Anal. calcd for  $C_{35}H_{50}F_3MnN_2O_5S (H_2O)_{0.8}$ : C, 57.02; H, 7.06; N, 3.80. Found: C, 56.98; H, 6.85; N, 3.84.

**Synthesis of 7.** To the solution of the metal-free ligand (200 mg, 0.38 mmol) dissolved in EtOH

(4 mL) and Et<sub>3</sub>N (1.07 mL, 7.71 mmol) was added 2 equiv. of Mn(OAc)<sub>2</sub>·(H<sub>2</sub>O)<sub>4</sub> (188.2 mg, 0.77 mmol). The resulting solution was heated to reflux at 120 °C for 3 h. After cooling, the solvent was removed under reduced pressure, and the residue was dried in vacuo. The residue dissolved in anhydrous CH<sub>2</sub>Cl<sub>2</sub> (10 mL) was washed with NaOD in D<sub>2</sub>O (0.5 M, 4 mL), which was prepared by dissolving NaH (55% dispersion in mineral oil, 87.3 mg, 2.0 mmol) in D<sub>2</sub>O (4 mL) and washing the resulting solution with anhydrous toluene (5 mL × 3) to remove the mineral oil. The organic layer was separated using a membrane filter (phase separator, Biotage), and the solvent was removed under reduced pressure. After drying in vacuo, the residue dissolved in anhydrous CH<sub>2</sub>Cl<sub>2</sub> (10 mL) was washed with CF<sub>3</sub>SO<sub>3</sub>H in D<sub>2</sub>O (0.5 M, 10 mL × 3). The organic layer was separated using a membrane filter (phase separator, Biotage), and the solvent was removed under reduced pressure. The residue dissolved in anhydrous CH<sub>2</sub>Cl<sub>2</sub> (5 mL) was passed through a membrane filter (Millex-FG, pore size 0.45 μm, diameter 13 mm, Millipore). The product was purified by precipitation in hot anhydrous hexane (20 mL), and was dried in vacuo. **7** (113 mg, 0.15 mmol) was obtained in a 40% yield.

**Synthesis of Mn<sup>III</sup>(L-*t*-Bu)(CN).** To the solution of Mn<sup>III</sup>(L-*t*-Bu)(Cl) (1.33 g, 2.09 mmol) dissolved in CH<sub>2</sub>Cl<sub>2</sub> (20 mL) and CH<sub>3</sub>OH (20 mL) was added 1 equiv. of KCN (135.8 mg, 2.09 mmol) in H<sub>2</sub>O (4 mL). The resulting suspension was stirred at room temperature for 10 h. The solvent was removed under reduced pressure, and the residue was dried in vacuo. CH<sub>3</sub>OH (20 mL) and H<sub>2</sub>O (60 mL) were added to the residue, and the resulting suspension was sonicated. The residue was filtered and was washed thoroughly with H<sub>2</sub>O. After drying in vacuo, the residue dissolved in CH<sub>2</sub>Cl<sub>2</sub> (50 mL) and CH<sub>3</sub>OH (10 mL) was passed through a membrane filter (Millex-FG, pore size 0.45 μm, diameter 13 mm, Millipore). The addition of hexane (40 mL) gave Mn<sup>III</sup>(L-*t*-Bu)(CN) (959.6 mg, 1.53 mmol) in a 74% yield, after drying vacuo at 50 °C for 12 h. Anal. calcd for C<sub>37</sub>H<sub>52</sub>MnN<sub>3</sub>O<sub>2</sub>: C,



71.02; H, 8.38; N, 6.71. Found: C, 70.83; H, 8.55; N, 6.65.

### **Preparations of $[\text{Mn}^{\text{III}}(\text{salen})(\text{X})_2]^-$ ( $\text{X} = \text{CN}^-, \text{OH}^-, \text{CH}_3\text{O}^-$ )**

**Preparations of  $[\text{Mn}^{\text{III}}(\text{salen})(\text{OH})_2]^-$  and  $[\text{Mn}^{\text{III}}(\text{salen})(\text{OMe})_2]^-$ .** The  $[\text{Mn}^{\text{III}}(\text{L-}t\text{-Bu})(\text{OH})_2]^-$  and  $[\text{Mn}^{\text{III}}(\text{L-}t\text{-Bu})(\text{OMe})_2]^-$  complexes were prepared by the addition of 2.5 equiv. of  $\text{Bu}_4\text{NOH}$  or 9.0 equiv. of  $\text{Bu}_4\text{NOMe}$  in  $\text{CH}_3\text{CH}_2\text{CN}$  (6.3 and 12.5 mM, 100 and 180  $\mu\text{L}$ , respectively) to the  $\text{CH}_3\text{CH}_2\text{CN}$  solution of  $\text{Mn}^{\text{III}}(\text{L-}t\text{-Bu})(\text{OTf})$  (0.5 mM, 0.5 mL) in a thin-layer quart cell ( $l = 0.1$  cm) via a gastight syringe. The resulting solution was stirred by Ar gas bubbling (10 mL) at 193 K before absorption spectral measurements. The EPR sample was prepared by the addition of 3 equiv. of  $\text{Bu}_4\text{NOH}$  (8.3 mM, 18  $\mu\text{L}$ , 0.15  $\mu\text{mol}$ ) in  $\text{CH}_3\text{CH}_2\text{CN}$  to the  $\text{CH}_3\text{CH}_2\text{CN}$  solution of  $\text{Mn}^{\text{III}}(\text{L-}t\text{-Bu})(\text{OTf})$  (0.61 mM, 82  $\mu\text{L}$ , 0.05  $\mu\text{mol}$ ) in the EPR tube at 193 K. After the solutions were well mixed, the resulting solution was frozen in liquid nitrogen for EPR measurements. In the case of CV measurements, 5 equiv. of  $\text{Bu}_4\text{NOH}$  (16.0 mg, 20.0  $\mu\text{mol}$ ) in electrochemical-grade  $\text{CH}_3\text{CH}_2\text{CN}$  (50  $\mu\text{L}$ ) was added to the solution of  $\text{Mn}^{\text{III}}(\text{L-}t\text{-Bu})(\text{OTf})$  (3.07 mg, 4.00  $\mu\text{mol}$ ) and  $\text{Bu}_4\text{NOTf}$  (313 mg, 0.80 mmol) in electrochemical-grade  $\text{CH}_3\text{CH}_2\text{CN}$  (8.00 mL) at 193 K.

**Preparations of  $[\text{Mn}^{\text{III}}(\text{salen})(\text{CN})_2]^-$ .** Absorption spectral changes for the titration experiments were measured by the addition of  $\text{Bu}_4\text{NCN}$  in  $\text{CH}_3\text{CN}$  (5 mM, 10 ~ 70  $\mu\text{L}$ ) to the  $\text{CH}_3\text{CN}$  solution of  $\text{Mn}^{\text{III}}(\text{L-}t\text{-Bu})(\text{CN})$  (0.5 mM, 0.5 mL) in a thin-layer quart cell ( $l = 0.1$  cm) at 243 K via a gastight syringe. The resulting solution was stirred by Ar gas bubbling (10 mL) at 243 K before spectral measurements. The NMR samples were obtained by the addition of  $\text{Bu}_4\text{NCN}$  (0.81 mg, 3.00  $\mu\text{mol}$ ) in  $\text{CD}_3\text{CN}$  (50  $\mu\text{L}$ ) to the suspension of  $\text{Mn}^{\text{III}}(\text{L-}t\text{-Bu})(\text{CN})$  (1.88 mg, 3.00  $\mu\text{mol}$ ) in  $\text{CD}_3\text{CN}$  (550  $\mu\text{L}$ ) at room temperature, which gave a clear solution. The resonance Raman sample was prepared by dissolving 3 equiv. of  $\text{Bu}_4\text{NCN}$  (4.03 mg, 15.0  $\mu\text{mol}$ ) in the solution of  $\text{Mn}^{\text{III}}(\text{L-}t\text{-Bu})(\text{OTf})$  (3.83 mg,

5.00  $\mu\text{mol}$ ) in  $\text{CH}_3\text{CN}$  (1 mL) at room temperature. An aliquot of the resulting solution (ca 0.3 mL) was transferred to the glass tube for the resonance Raman measurement. In the case of the EPR measurement, an aliquot of the same solution (0.1 mL) was taken in the EPR tube. In the case of CV measurements, 5 equiv. of  $\text{Bu}_4\text{NCN}$  (5.37 mg, 20.0  $\mu\text{mol}$ ) and  $\text{Bu}_4\text{NOTf}$  (313 mg, 0.80 mmol) were dissolved in the solution of  $\text{Mn}^{\text{III}}(\text{L-}t\text{-Bu})(\text{OTf})$  (3.07 mg, 4.00  $\mu\text{mol}$ ) in electrochemical-grade  $\text{CH}_3\text{CN}$  (8.00 mL) at room temperature.

**Preparation of the Solid  $\text{Bu}_4\text{N} [\text{Mn}^{\text{III}}(\text{L-}t\text{-Bu})(\text{CN})_2]$  Sample for SQUID and IR Measurements.** To the solution of  $\text{Bu}_4\text{NCN}$  (62.0 mg, 0.231 mmol) in  $\text{CH}_3\text{CN}$  (5 mL) was added the  $\text{Mn}^{\text{III}}(\text{L-}t\text{-Bu})(\text{CN})$  complex (144.5 mg, 0.231 mmol) at room temperature. After sonication, the resulting solution was passed through a membrane filter (Millex-FG, pore size 0.45  $\mu\text{m}$ , diameter 13 mm, Millipore). The solvent was removed under reduced pressure, and the residue was dried in vacuo at room temperature for 24 h. Anal. calcd for  $\text{C}_{54}\text{H}_{88}\text{MnN}_5\text{O}_2\cdot\text{H}_2\text{O}$ : C, 71.10; H, 9.94; N, 7.68. Found: C, 71.10; H, 9.89; N, 7.73.

#### **Assignments of the Resonance Raman Bands from $\text{Mn}^{\text{III}}(\text{salen})(\text{OTf})$ and $[\text{Mn}^{\text{III}}(\text{salen})(\text{CN})_2]^-$ .**

Figure S1(a) shows resonance Raman spectra of  $\text{Mn}^{\text{III}}(\text{L-}t\text{-Bu})(\text{OTf})$  (blue line) and  $\text{Mn}^{\text{III}}(\text{L-}t\text{-Bu-}d_2)(\text{OTf})$  (red line), where  $\text{L-}t\text{-Bu-}d_2$  has a D atom at the imino carbon in contrast to a H atom in  $\text{L-}t\text{-Bu}$  (Chart S2). The resonance Raman band at 1620  $\text{cm}^{-1}$  in  $\text{Mn}^{\text{III}}(\text{L-}t\text{-Bu})(\text{OTf})$  shifts to 1603  $\text{cm}^{-1}$  in  $\text{Mn}^{\text{III}}(\text{L-}t\text{-Bu-}d_2)(\text{OTf})$ , while the resonance Raman band at 1536  $\text{cm}^{-1}$  in  $\text{Mn}^{\text{III}}(\text{L-}t\text{-Bu})(\text{OTf})$  is observed at exactly the same wavenumber in  $\text{Mn}^{\text{III}}(\text{L-}t\text{-Bu-}d_2)(\text{OTf})$ . Figure S1(b) shows resonance Raman spectra of  $[\text{Mn}^{\text{III}}(\text{L-}t\text{-Bu})(\text{CN})_2]^-$  (blue line) and  $[\text{Mn}^{\text{III}}(\text{L-}t\text{-Bu-}d_2)(\text{CN})_2]^-$  (red line). The resonance Raman band at 1597  $\text{cm}^{-1}$  in  $[\text{Mn}^{\text{III}}(\text{L-}t\text{-Bu})(\text{CN})_2]^-$  is shifted to 1578  $\text{cm}^{-1}$  in  $[\text{Mn}^{\text{III}}(\text{L-}t\text{-Bu-}d_2)(\text{CN})_2]^-$ , while the resonance Raman band at 1524  $\text{cm}^{-1}$  in  $[\text{Mn}^{\text{III}}(\text{L-}t\text{-Bu})(\text{CN})_2]^-$  is only slightly

shifted to 1521  $\text{cm}^{-1}$  in  $[\text{Mn}^{\text{III}}(\text{L-}t\text{-Bu-}d_2)(\text{CN})_2]^-$ . Then, the resonance Raman bands at 1620  $\text{cm}^{-1}$  in  $\text{Mn}^{\text{III}}(\text{L-}t\text{-Bu})(\text{OTf})$  and at 1597  $\text{cm}^{-1}$  in  $[\text{Mn}^{\text{III}}(\text{L-}t\text{-Bu})(\text{CN})_2]^-$  are sensitive for the H/D exchange at the imino groups.

**Chart S2.** Structures of L-*t*-Bu and L-*t*-Bu- $d_2$ .

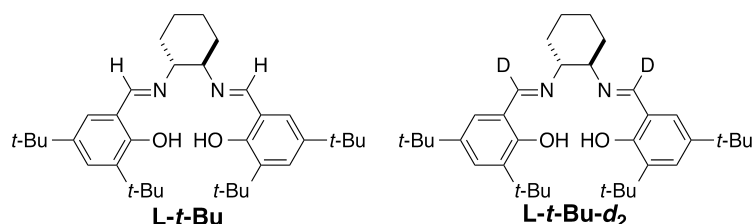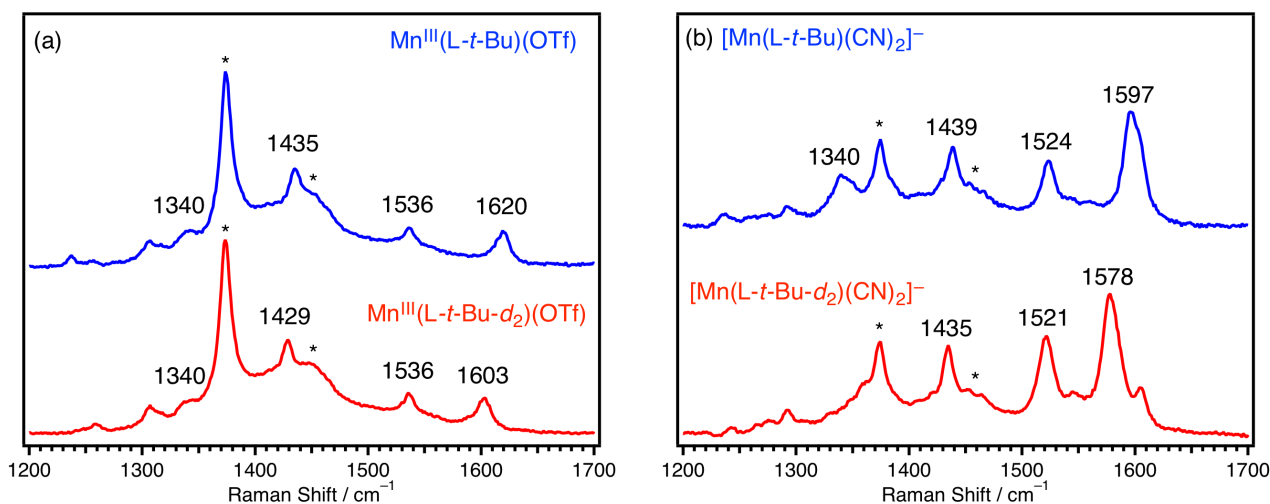

**Figure S1.** (a) Resonance Raman spectra of  $\text{Mn}^{\text{III}}(\text{L-}t\text{-Bu})(\text{OTf})$  (blue line) and  $\text{Mn}^{\text{III}}(\text{L-}t\text{-Bu-}d_2)(\text{OTf})$  (red line). (b) Resonance Raman spectra of  $[\text{Mn}^{\text{III}}(\text{L-}t\text{-Bu})(\text{CN})_2]^-$  (blue line) and  $[\text{Mn}^{\text{III}}(\text{L-}t\text{-Bu-}d_2)(\text{CN})_2]^-$  (red line). Resonance Raman spectra were measured at the excitation wavelength of 488 nm in  $\text{CH}_3\text{CN}$  at room temperature (5 mM). The bands denoted with \* come from  $\text{CH}_3\text{CN}$  solvent.

Figure S2(a) shows resonance Raman spectra of  $\text{Mn}^{\text{III}}(\text{L-}t\text{-Bu})(\text{OTf})$  (blue line) and  $\text{Mn}^{\text{III}}(\text{L-}t\text{-Bu-}d_4)(\text{OTf})$  (red line), where L-*t*-Bu- $d_4$  has D atoms at the phenolate in contrast to H atoms in L-*t*-Bu

(Chart S3). The resonance Raman band at  $1536\text{ cm}^{-1}$  in  $\text{Mn}^{\text{III}}(\text{L-}t\text{-Bu})(\text{OTf})$  shifts to  $1524\text{ cm}^{-1}$  in  $\text{Mn}^{\text{III}}(\text{L-}t\text{-Bu-}d_4)(\text{OTf})$ , while the resonance Raman band at  $1620\text{ cm}^{-1}$  in  $\text{Mn}^{\text{III}}(\text{L-}t\text{-Bu})(\text{OTf})$  is observed at exactly the same wavenumber in  $\text{Mn}^{\text{III}}(\text{L-}t\text{-Bu-}d_4)(\text{OTf})$ . Figure S2(b) shows resonance Raman spectra of  $[\text{Mn}^{\text{III}}(\text{L-}t\text{-Bu})(\text{CN})_2]^-$  (blue line) and  $[\text{Mn}^{\text{III}}(\text{L-}t\text{-Bu-}d_4)(\text{CN})_2]^-$  (red line). The resonance Raman band at  $1524\text{ cm}^{-1}$  in  $[\text{Mn}^{\text{III}}(\text{L-}t\text{-Bu})(\text{CN})_2]^-$  is shifted to  $1510\text{ cm}^{-1}$  in  $[\text{Mn}^{\text{III}}(\text{L-}t\text{-Bu-}d_4)(\text{CN})_2]^-$ , while the resonance Raman band at  $1597\text{ cm}^{-1}$  in  $[\text{Mn}^{\text{III}}(\text{L-}t\text{-Bu})(\text{CN})_2]^-$  is only slightly

**Chart S3.** Structures of L-*t*-Bu and L-*t*-Bu- $d_4$ .

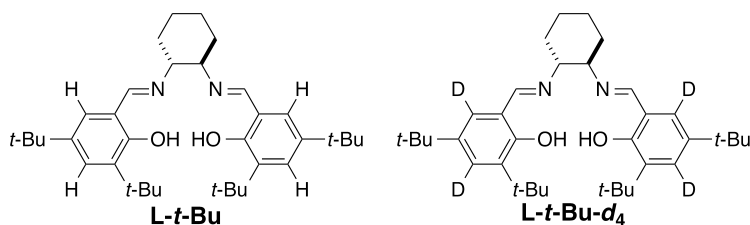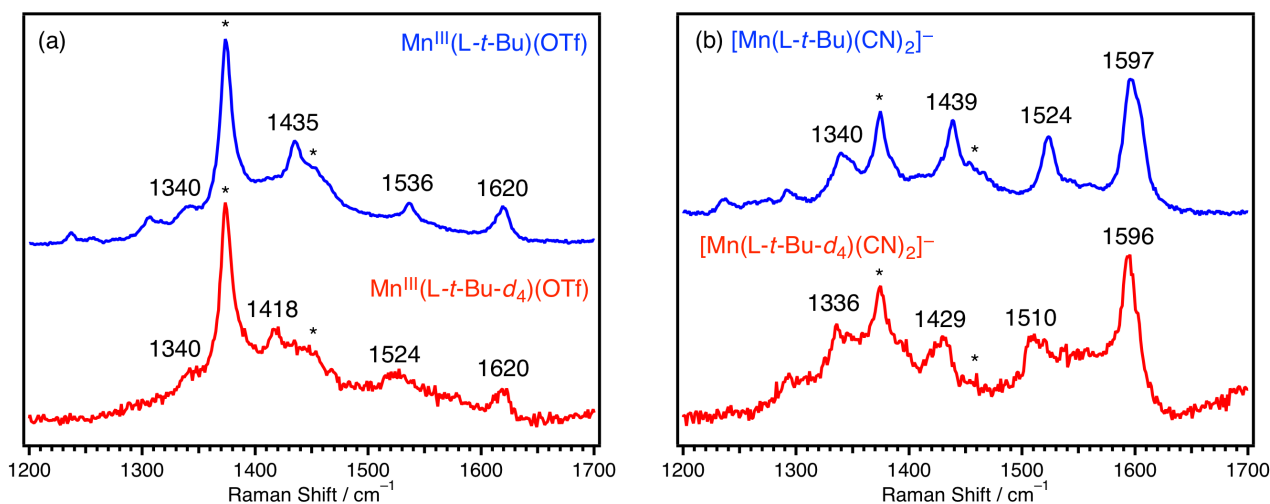

**Figure S2.** (a) Resonance Raman spectra of  $\text{Mn}^{\text{III}}(\text{L-}t\text{-Bu})(\text{OTf})$  (blue line) and  $\text{Mn}^{\text{III}}(\text{L-}t\text{-Bu-}d_4)(\text{OTf})$  (red line). (b) Resonance Raman spectra of  $[\text{Mn}^{\text{III}}(\text{L-}t\text{-Bu})(\text{CN})_2]^-$  (blue line) and  $[\text{Mn}^{\text{III}}(\text{L-}t\text{-Bu-}d_4)(\text{CN})_2]^-$  (red line). Resonance Raman spectra were measured at the excitation wavelength of 488 nm in  $\text{CH}_3\text{CN}$  at room temperature (5 mM). The bands denoted with \* come from  $\text{CH}_3\text{CN}$  solvent.

shifted to 1596 cm<sup>-1</sup> in [Mn<sup>III</sup>(L-*t*-Bu-*d*<sub>4</sub>)(CN)<sub>2</sub>]<sup>-</sup>. Then, the resonance Raman bands at 1536 cm<sup>-1</sup> in Mn<sup>III</sup>(L-*t*-Bu)(OTf) and at 1524 cm<sup>-1</sup> in [Mn<sup>III</sup>(L-*t*-Bu)(CN)<sub>2</sub>]<sup>-</sup> are sensitive for the H/D exchange at the phenolate groups.

**Table S1.** Calculated H/D Isotope-Sensitive Vibrations.<sup>a</sup>

| vibration mode | calcd shift (IR intensity) / cm <sup>-1</sup> |                                                            |                                                            |
|----------------|-----------------------------------------------|------------------------------------------------------------|------------------------------------------------------------|
|                | Ni <sup>II</sup> (L- <i>t</i> -Bu)            | Ni <sup>II</sup> (L- <i>t</i> -Bu- <i>d</i> <sub>2</sub> ) | Ni <sup>II</sup> (L- <i>t</i> -Bu- <i>d</i> <sub>4</sub> ) |
| 221A           | 1620 (43)                                     | 1608 (40)                                                  | 1619 (49)                                                  |
| 220A           | 1610 (92)                                     | 1601 (12)                                                  | 1608 (141)                                                 |
| 219A           | 1597 (37)                                     | 1597 (34)                                                  | 1589 (29)                                                  |
| 218A           | 1593 (284)                                    | 1591 (381)                                                 | 1585 (259)                                                 |
| 217A           | 1499 (167)                                    | 1499 (172)                                                 | 1491 (189)                                                 |
| 216A           | 1498 (35)                                     | 1497 (41)                                                  | 1489 (44)                                                  |

<sup>a</sup> For the purpose of comparison with the experimental resonance Raman shifts, the calculated shifts were corrected by the scaling factor of 0.8774.

To interpret the experimental observation, vibration analyses were carried out on the HyperChem program package using a semi-empirical method (PM3). In the calculations, the diamagnetic nickel(II) complexes with L-*t*-Bu, L-*t*-Bu-*d*<sub>2</sub> and L-*t*-Bu-*d*<sub>4</sub> were utilized as model compounds. The calculations for the Ni<sup>II</sup>(L-*t*-Bu) model predicted two sets of vibrations at 1620 – 1593 cm<sup>-1</sup> (221A–218A) and at 1499 – 1498 cm<sup>-1</sup> (217A–216A) as the first and second highest-wavenumber vibrations, which are well compared with the resonance Raman bands at 1620 / 1536 cm<sup>-1</sup> for Mn<sup>III</sup>(L-*t*-Bu)(OTf) and 1597 / 1524 cm<sup>-1</sup> for [Mn<sup>III</sup>(L-*t*-Bu)(CN)<sub>2</sub>]<sup>-</sup>.

Comparison of  $\text{Ni}^{\text{II}}(\text{L-}t\text{-Bu})$  and  $\text{Ni}^{\text{II}}(\text{L-}t\text{-Bu-}d_2)$  models shows that the only vibrations that are isotope-sensitive are 221A and 220A modes, both of which mainly contain a C=N stretching (Figure S3). Isotope-sensitive vibrations upon the H/D exchange at the imino group that appear at the highest wavenumber is nicely consistent with the experimental observations, although the calculated isotope shifts (12 or 9  $\text{cm}^{-1}$ ) are smaller than the observed isotope shifts of 17 and 19  $\text{cm}^{-1}$  for  $\text{Mn}^{\text{III}}(\text{L-}t\text{-Bu})(\text{OTf})$  and  $[\text{Mn}^{\text{III}}(\text{L-}t\text{-Bu})(\text{CN})_2]^-$ , respectively.

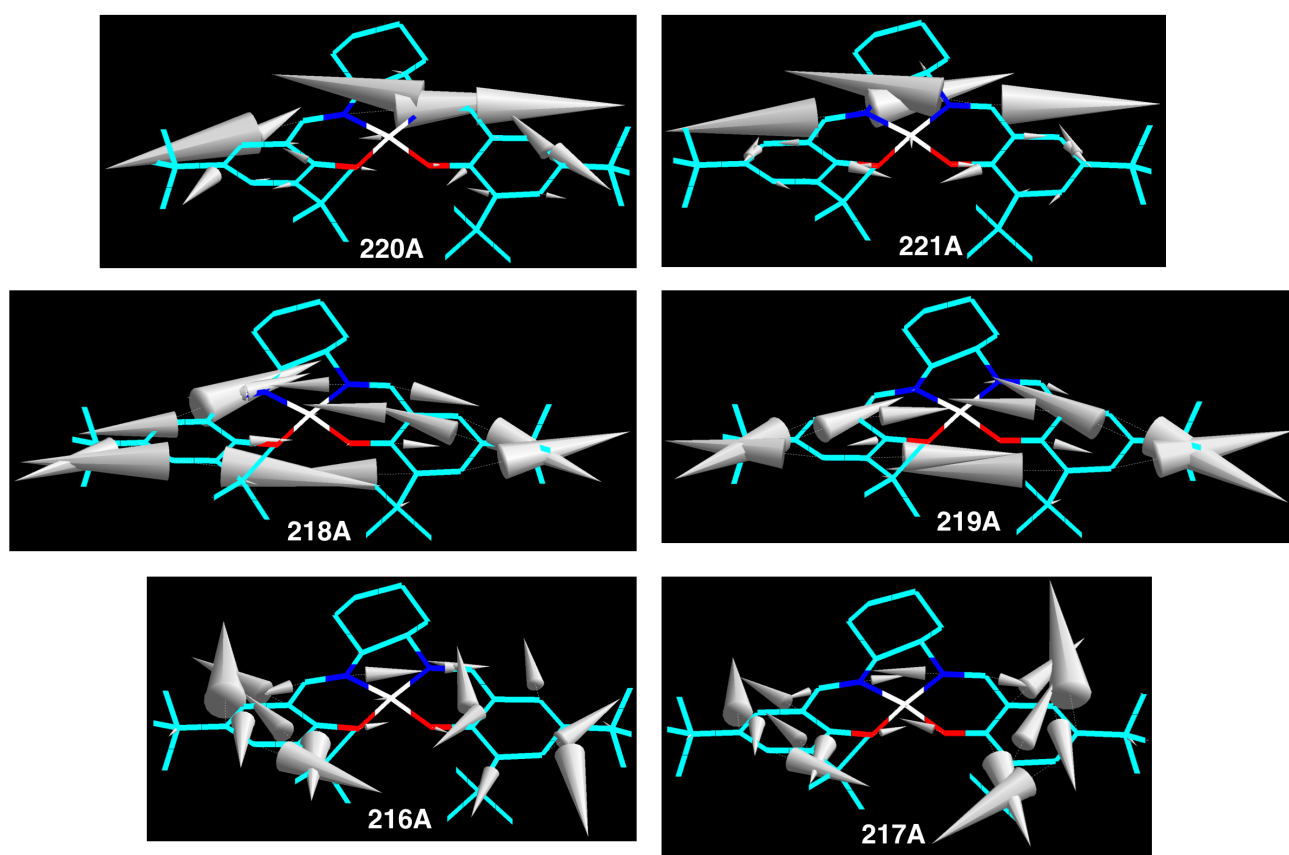

**Figure S3.** Calculated vibration modes that appear in a higher-wavenumber region.

According to the calculations on  $\text{Ni}^{\text{II}}(\text{L-}t\text{-Bu})$  and  $\text{Ni}^{\text{II}}(\text{L-}t\text{-Bu-}d_4)$  models, the 221A and 220A vibrations are not isotope-sensitive at all upon the H/D exchange at the phenolate group. But the other modes (219A and 218A) that belong to the first set of the vibrations are predicted to be isotope-

sensitive upon the H/D exchange at the phenolate group. Because the resonance Raman bands at  $1620\text{ cm}^{-1}$  for  $\text{Mn}^{\text{III}}(\text{L-}t\text{-Bu})(\text{OTf})$  and  $1597\text{ cm}^{-1}$  for  $[\text{Mn}^{\text{III}}(\text{L-}t\text{-Bu})(\text{CN})_2]^-$  are not isotope-sensitive upon the H/D exchange at the phenolate group, the observed vibrations are 221A and 220A modes and the 219A and 218A vibrations are too small to be detected under the present measurement conditions.

The second set of vibrations (217A and 216A), which correspond to the resonance Raman bands at  $1536\text{ cm}^{-1}$  for  $\text{Mn}^{\text{III}}(\text{L-}t\text{-Bu})(\text{OTf})$  and  $1524\text{ cm}^{-1}$  for  $[\text{Mn}^{\text{III}}(\text{L-}t\text{-Bu})(\text{CN})_2]^-$ , are not isotope-sensitive upon the H/D exchange at the imino group, but are isotope-sensitive upon the H/D exchange at the phenolate group. This calculation result is fully consistent with the experimental observation. But the predicted isotope shifts (8 or  $9\text{ cm}^{-1}$ ) are also smaller than the observed shifts of 12 and  $14\text{ cm}^{-1}$  for  $\text{Mn}^{\text{III}}(\text{L-}t\text{-Bu})(\text{OTf})$  and  $[\text{Mn}^{\text{III}}(\text{L-}t\text{-Bu})(\text{CN})_2]^-$ , respectively.

#### **Assignments of the $^1\text{H}$ NMR Signals from $\text{Mn}^{\text{III}}(\text{salen})(\text{OTf})$ and $[\text{Mn}^{\text{III}}(\text{salen})(\text{CN})_2]^-$ .**

$^1\text{H}$  NMR signals from H and  $\text{CH}_3$  groups attached to the phenolate rings were determined by the comparison of  $^1\text{H}$  NMR spectra of  $\text{Mn}^{\text{III}}(\text{salen})(\text{OTf})$  and  $[\text{Mn}^{\text{III}}(\text{salen})(\text{CN})_2]^-$  (Figure S4 and S5), where "salen" is non-substituted or dimethyl salen ligands shown in Chart S1.

The  $^1\text{H}$  NMR signal of the imino H in  $\text{Mn}^{\text{III}}(\text{L-}t\text{-Bu})(\text{OTf})$  could not be observed, and then the  $^2\text{H}$  NMR shift of  $\text{Mn}^{\text{III}}(\text{L-}t\text{-Bu-}d_2)(\text{OTf})$ , which was reported previously,<sup>7</sup> was utilized here. The  $^1\text{H}$  NMR shift of the imino H in  $[\text{Mn}^{\text{III}}(\text{L-}t\text{-Bu})(\text{CN})_2]^-$  was determined from the  $^1\text{H}$  and  $^2\text{H}$  NMR spectra shown in Figure 7.

The  $^1\text{H}$  NMR shifts of the  $\text{CH}_3$  groups attached to the imino carbon were determined from the  $^1\text{H}$  and  $^2\text{H}$  NMR spectra of  $\text{Mn}^{\text{III}}(\text{salen})(\text{OTf})$  and  $[\text{Mn}^{\text{III}}(\text{salen})(\text{CN})_2]^-$  from **6** and **7** (Chart S1), as shown in Figure S6 and S7. The formation of  $[\text{Mn}^{\text{III}}(\text{salen})(\text{CN})_2]^-$  species from **1** – **6** was also confirmed with absorption spectroscopy (Figure S8).

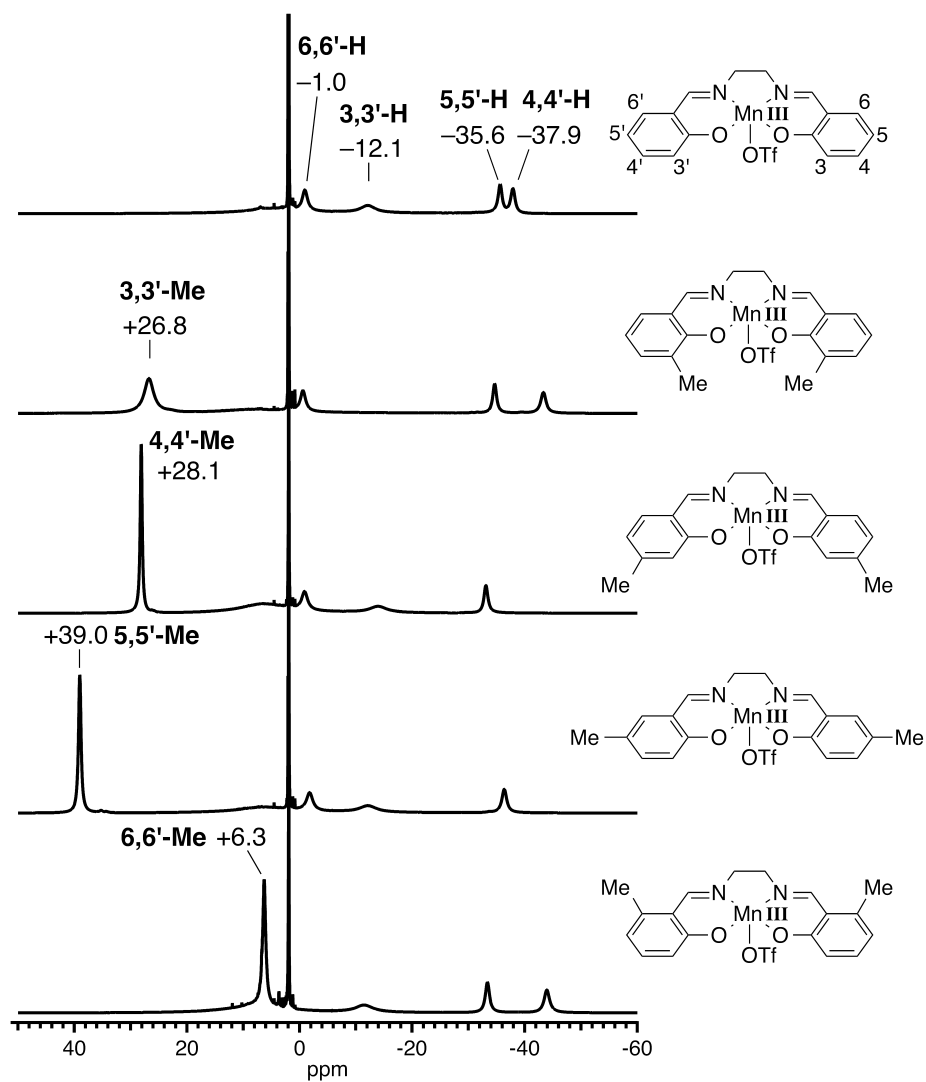

**Figure S4.**  $^1\text{H}$  NMR spectra of  $\text{Mn}^{\text{III}}(\text{salen})(\text{OTf})$ , where "salen" is non-substituted or dimethyl salen ligands.  $^1\text{H}$  NMR measurements were carried out for the 5 mM solutions in  $\text{CD}_3\text{CN}$  at 243 K.



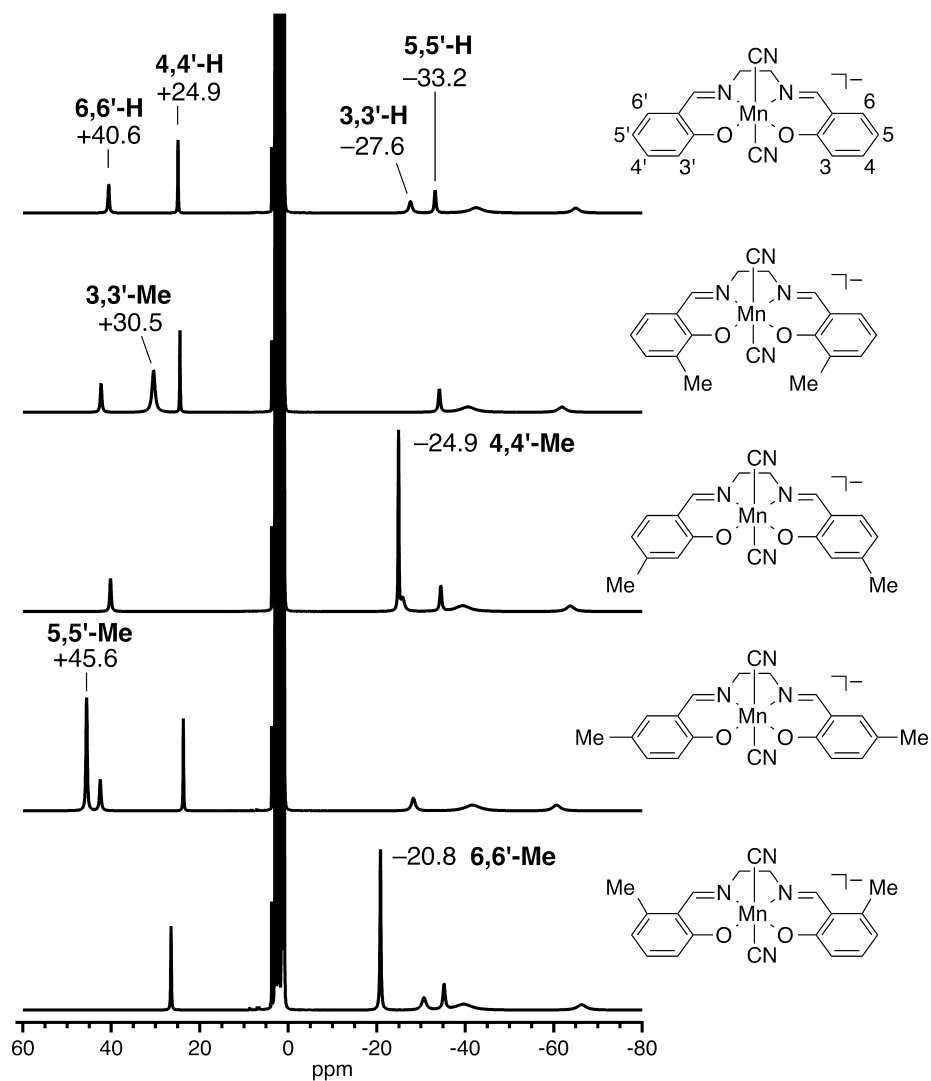

**Figure S5.**  $^1\text{H}$  NMR spectra of  $[\text{Mn}^{\text{III}}(\text{salen})(\text{CN})_2]^-$ , where "salen" is non-substituted or dimethyl salen ligands.  $^1\text{H}$  NMR measurements were carried out for the 5 mM solutions in  $\text{CD}_3\text{CN}$  at 243 K. The  $[\text{Mn}^{\text{III}}(\text{salen})(\text{CN})_2]^-$  complexes were prepared by reactions of  $\text{Mn}^{\text{III}}(\text{salen})(\text{OTf})$  with 3 equiv. of  $\text{Bu}_4\text{NCN}$ .

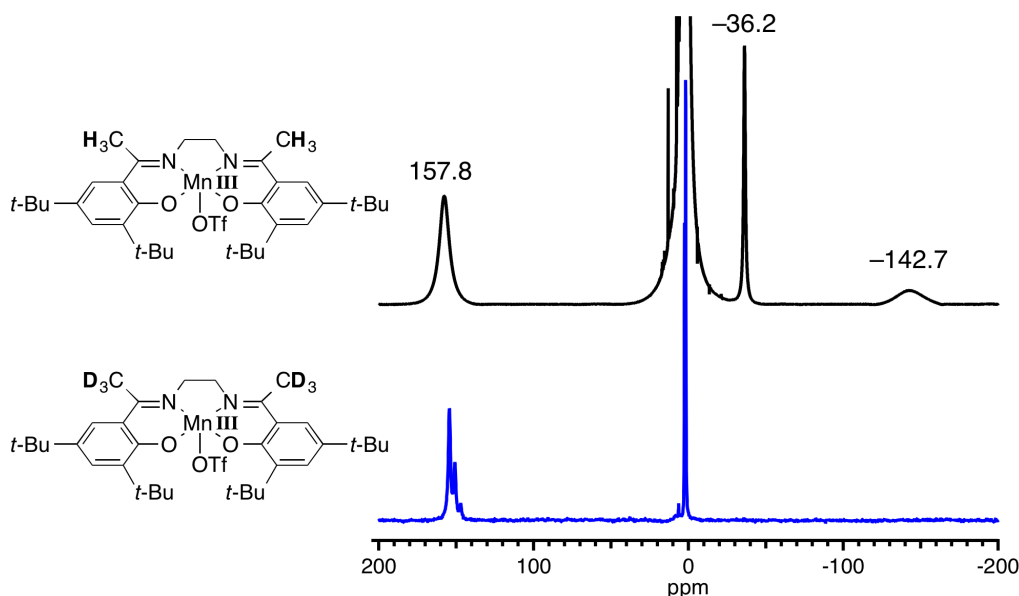

**Figure S6.**  $^1\text{H}$  NMR spectrum (black line) of  $\text{Mn}^{\text{III}}(\text{salen})(\text{OTf})$  in  $\text{CD}_3\text{CN}$  at 243 K (5 mM), where "salen" is a salen ligand bearing a  $\text{CH}_3$  group at the imino carbon.  $^2\text{H}$  NMR spectrum (blue line) of  $\text{Mn}^{\text{III}}(\text{salen})(\text{OTf})$  in  $\text{CH}_3\text{CN}$  at 243 K (5 mM), where "salen" is a salen ligand bearing a  $\text{CD}_3$  group at the imino carbon.

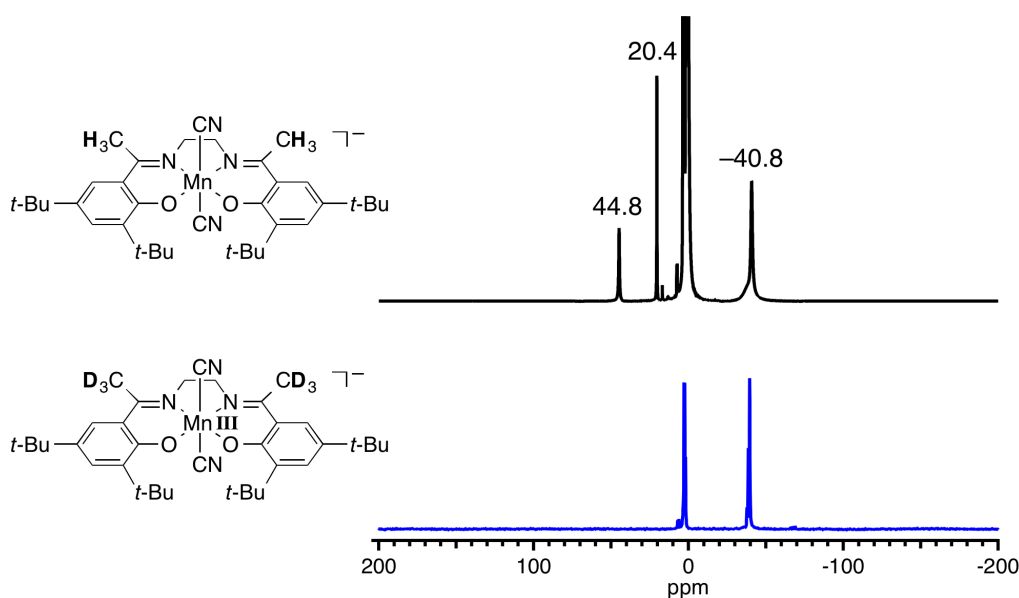

**Figure S7.**  $^1\text{H}$  NMR spectrum (black line) of  $[\text{Mn}^{\text{III}}(\text{salen})(\text{CN})]^-$  in  $\text{CD}_3\text{CN}$  at 243 K (5 mM), where "salen" is a salen ligand bearing a  $\text{CH}_3$  group at the imino carbon.  $^2\text{H}$  NMR spectrum (blue line) of  $[\text{Mn}^{\text{III}}(\text{salen})(\text{CN})]^-$  in  $\text{CH}_3\text{CN}$  at 243 K (5 mM), where "salen" is a salen ligand bearing a  $\text{CD}_3$  group at the imino carbon. The  $[\text{Mn}^{\text{III}}(\text{salen})(\text{CN})_2]^-$  complex was prepared by the reaction of  $\text{Mn}^{\text{III}}(\text{salen})(\text{OTf})$  with 3 equiv. of  $\text{Bu}_4\text{NCN}$ .

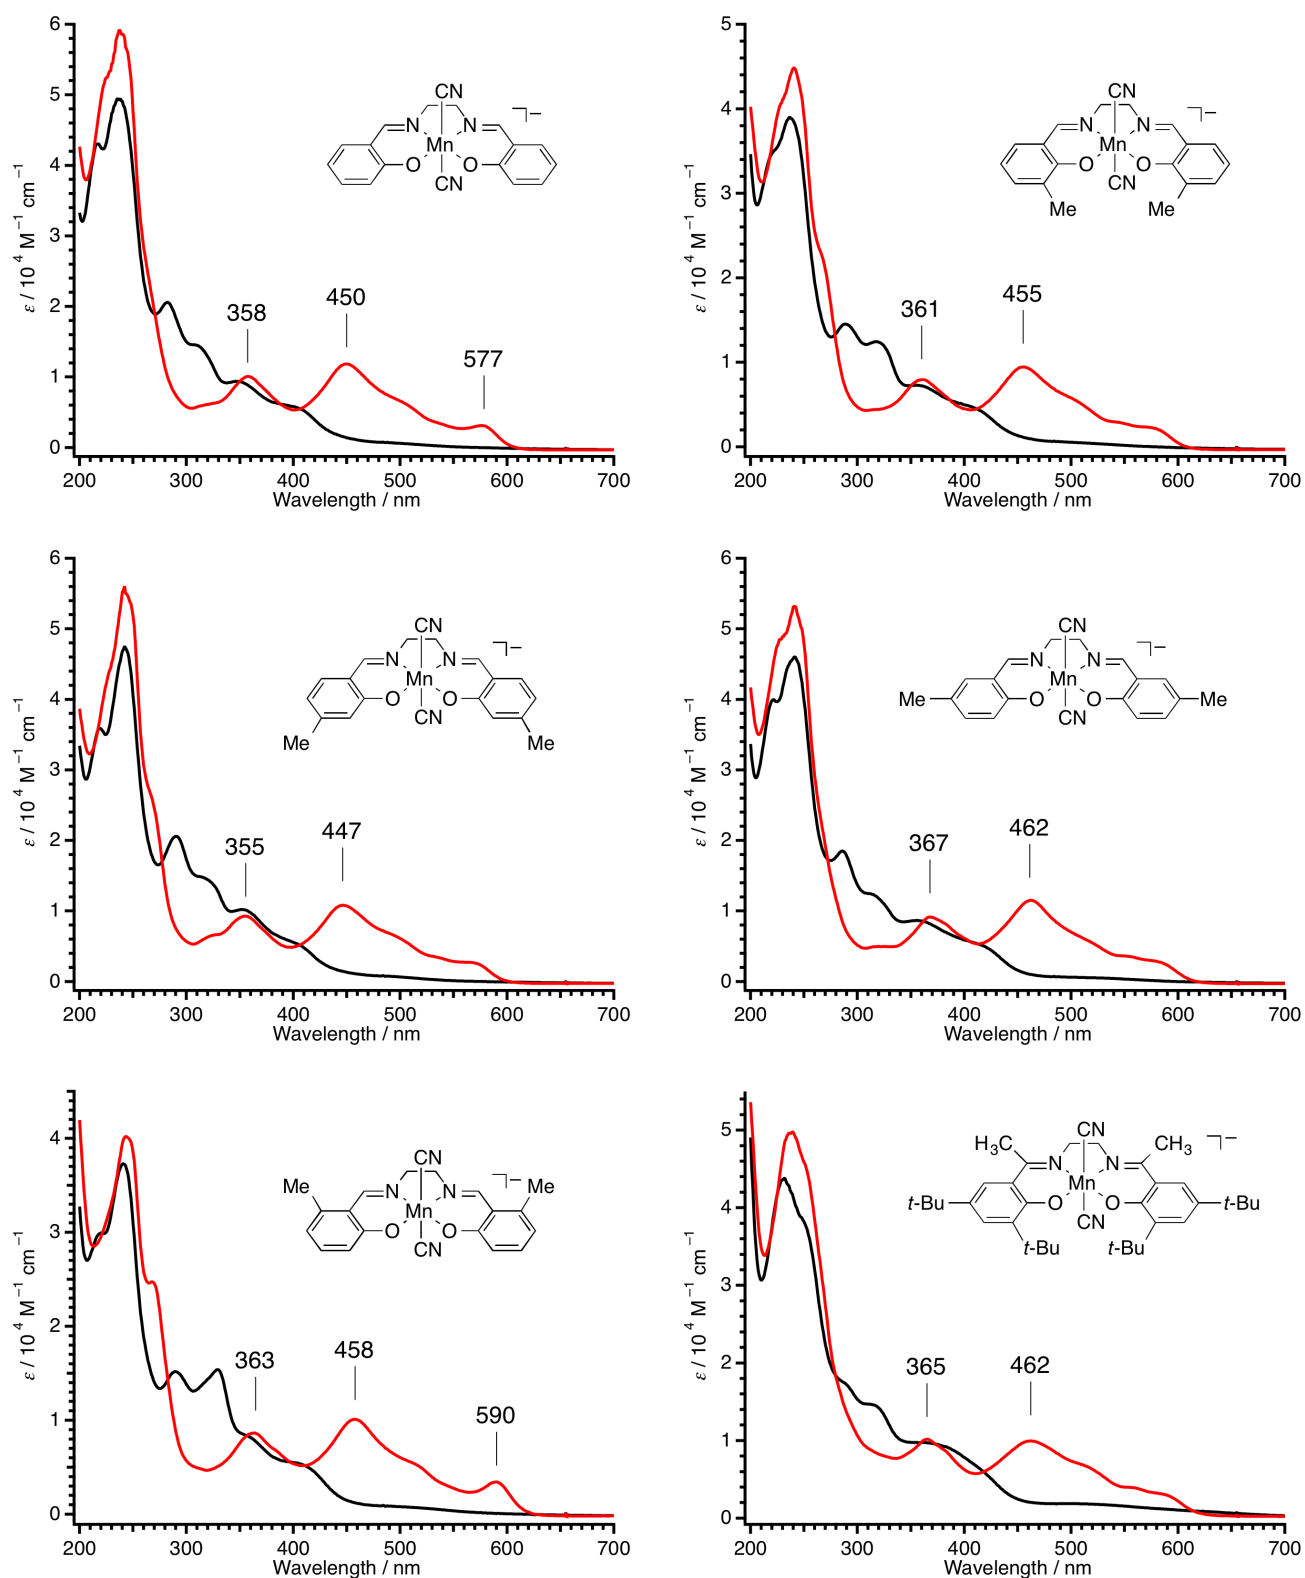

**Figure S8.** Absorption spectra of  $\text{Mn}^{\text{III}}(\text{salen})(\text{OTf})$  (black line) and  $[\text{Mn}^{\text{III}}(\text{salen})(\text{CN})_2]^-$  (red line) in  $\text{CH}_3\text{CN}$  at 243 K (0.5 mM, 0.1 cm cell), where "salen" is non-substituted or dimethyl salen ligands. The  $[\text{Mn}^{\text{III}}(\text{salen})(\text{CN})_2]^-$  complexes were prepared by reactions of  $\text{Mn}^{\text{III}}(\text{salen})(\text{OTf})$  with 3 equiv. of  $\text{Bu}_4\text{NCN}$ .

## Magnetic Susceptibility Measurements by Evans Method.

TMS (tetramethylsilane) (16  $\mu\text{L}$ ) as the standard for the paramagnetic shift was added to  $\text{CD}_3\text{CN}$  (3.2 mL) to give 0.5 % TMS- $\text{CD}_3\text{CN}$ .  $\text{Mn}^{\text{III}}(\text{L-}t\text{-Bu})(\text{OTf})$  (2.03 mg, 2.65  $\mu\text{mol}$ ) dissolved in 0.5% TMS- $\text{CD}_3\text{CN}$  (530  $\mu\text{L}$ ) was transferred to a NMR tube (Wilmad NMR tube, 5 mm, 7 in., Z272027). A coaxial insert (Wilmad coaxial insert, Z278513), which contains 0.5% TMS- $\text{CD}_3\text{CN}$  (60  $\mu\text{L}$ ), was immersed in the  $\text{Mn}^{\text{III}}(\text{L-}t\text{-Bu})(\text{OTf})$  solution in the NMR tube for a usual  $^1\text{H}$  NMR measurement. In the case of  $[\text{Mn}^{\text{III}}(\text{L-}t\text{-Bu})(\text{CN})_2]^-$ , the sample solution of  $\text{Mn}^{\text{III}}(\text{L-}t\text{-Bu})(\text{OTf})$  (2.03 mg, 2.65  $\mu\text{mol}$ ) and 2 equiv. of  $\text{Bu}_4\text{NCN}$  (1.42 mg, 5.29  $\mu\text{mol}$ ) in 0.5% TMS- $\text{CD}_3\text{CN}$  (530  $\mu\text{L}$ ) was transferred to the NMR tube.

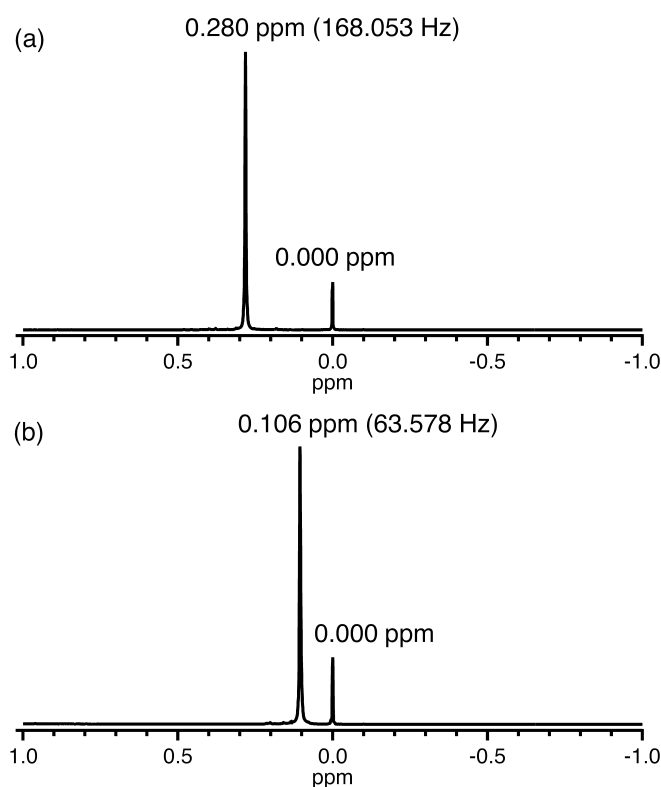

**Figure S9.** 600 MHz  $^1\text{H}$  NMR Evans method experiments for  $\text{Mn}^{\text{III}}(\text{L-}t\text{-Bu})(\text{OTf})$  and  $[\text{Mn}^{\text{III}}(\text{L-}t\text{-Bu})(\text{CN})_2]^-$ .

One of the  $^1\text{H}$  NMR signals comes from tetramethylsilane (37 mM) in the presence of (a)  $\text{Mn}^{\text{III}}(\text{L-}t\text{-Bu})(\text{OTf})$  or (b)  $[\text{Mn}^{\text{III}}(\text{L-}t\text{-Bu})(\text{CN})_2]^-$  (5 mM) in  $\text{CD}_3\text{CN}$  at 243 K. The other signal comes from the  $\text{CD}_3\text{CN}$  solution of tetramethylsilane (37 mM) in a coaxial insert.

$^1\text{H}$  NMR spectra were measured at 243 K, and the chemical shift of the TMS peak in the presence of  $\text{Mn}^{\text{III}}(\text{L-}t\text{-Bu})(\text{OTf})$  or  $[\text{Mn}^{\text{III}}(\text{L-}t\text{-Bu})(\text{CN})_2]^-$  was compared to that of the TMS peak in the inner coaxial insert containing only the TMS standard (Figure S9). Mass susceptibility values of substance ( $\chi_{\text{mass}}$ ) were calculated according to the modified Evans equation (1)<sup>8</sup> derived from the original Evans equation developed for low-field NMR instruments, where the applied polarizing magnetic field is transverse to the long axis of the cylindrical sample.<sup>9</sup>

$$\chi_{\text{mass}} = \frac{3\Delta f}{4\pi f m} + \chi_0 + \frac{\chi_0(d_0 - d_s)}{m} \quad (1)$$

$\chi_{\text{mass}}$  ( $\text{cm}^3 \text{g}^{-1}$ ): mass susceptibility of substance

$\Delta f$  (Hz): observed frequency shift of reference resonance (= difference of TMS shifts in the present case)

$f$  (Hz): spectrometer frequency ( $= 597.9 \times 10^6$  Hz in the present case)

$\chi_0$  ( $\text{cm}^3 \text{g}^{-1}$ ): mass susceptibility of solvent

$m$  ( $\text{g cm}^{-3}$ ): mass of substance per  $\text{cm}^3$  of solution

$d_0$  ( $\text{g cm}^{-3}$ ): density of solvent

$d_s$  ( $\text{g cm}^{-3}$ ): density of solution

Here, the density of  $\text{CD}_3\text{CN}$  in the presence and absence of a metal complex ( $d_s$  and  $d_0$ ) was assumed to be equal. The density of  $\text{CD}_3\text{CN}$  at 243 K was estimated from the temperature dependence of the  $\text{CH}_3\text{CN}$  density ( $0.7764 \text{ g cm}^{-3}$  at 298 K and  $0.8378 \text{ g cm}^{-3}$  at 243 K, as adopted from Dortmund Data Bank) for the calculation of  $m$  at 243 K. The  $\chi_0$  value is approximately equal to the mass susceptibility of  $\text{CH}_3\text{CN}$  ( $-0.532 \times 10^{-6} \text{ cm}^3 \text{g}^{-1}$ ).<sup>10</sup>

The experimental  $\chi_{\text{mass}}$  values thus obtained were converted to the  $\mu_{\text{eff}}$  values according to the textbook equation (2) after the diamagnetic susceptibility correction of the ligand using Pascal's constants.<sup>11</sup> Note that the contribution from the calculated diamagnetic susceptibility correction term

is relatively larger for  $[\text{Mn}^{\text{III}}(\text{L-}t\text{-Bu})(\text{CN})_2]^-$  than  $\text{Mn}^{\text{III}}(\text{L-}t\text{-Bu})(\text{OTf})$ ;  $\chi_{\text{mass}} \times M = 4.287 \times 10^{-3} \text{ cm}^3 \text{ mol}^{-1}$ ,  $\chi_{\text{mol}}^{\text{dia}} = -0.605 \times 10^{-3} \text{ cm}^3 \text{ mol}^{-1}$  for  $[\text{Mn}^{\text{III}}(\text{L-}t\text{-Bu})(\text{CN})_2]^-$ ;  $\chi_{\text{mass}} \times M = 12.00 \times 10^{-3} \text{ cm}^3 \text{ mol}^{-1}$ ,  $\chi_{\text{mol}}^{\text{dia}} = -0.447 \times 10^{-3} \text{ cm}^3 \text{ mol}^{-1}$  for  $\text{Mn}^{\text{III}}(\text{L-}t\text{-Bu})(\text{OTf})$ .

$$\mu_{\text{eff}} = 2.828 \times \sqrt{\chi_{\text{mol}}^{\text{para}} \times T} \quad (2)$$

$$\chi_{\text{mol}}^{\text{para}} = \chi_{\text{mass}} \times M - \chi_{\text{mol}}^{\text{dia}}$$

$\mu_{\text{eff}} (\mu_{\text{B}})$ : effective magnetic moment of metal ion

$\chi_{\text{mol}}^{\text{para}} (\text{cm}^3 \text{ mol}^{-1})$ : molar susceptibility of metal ion

$\chi_{\text{mol}}^{\text{dia}} (\text{cm}^3 \text{ mol}^{-1})$ : calculated molar diamagnetic susceptibility of a ligand

$M$ : molecular weight of substance

The magnetic susceptibility of  $[\text{Mn}^{\text{III}}(\text{L-}t\text{-Bu})(\text{OH})_2]^-$  was determined in exactly the same manner using  $\text{Mn}^{\text{III}}(\text{L-}t\text{-Bu})(\text{OTf})$  (2.03 mg, 2.65  $\mu\text{mol}$ ) and 3 equiv. of  $\text{Bu}_4\text{NOH}$  (6.10 mg, 7.95  $\mu\text{mol}$ ) (Figure S10b). Although the  $[\text{Mn}^{\text{III}}(\text{L-}t\text{-Bu})(\text{OH})_2]^-$  species was prepared at low temperature, it was difficult to completely avoid decomposition of  $[\text{Mn}^{\text{III}}(\text{L-}t\text{-Bu})(\text{OH})_2]^-$ . To estimate a possible experimental error, the solution of 3 equiv. of acetic acid (0.477 mg, 7.95  $\mu\text{mol}$ ) in  $\text{CD}_3\text{CN}$  (20  $\mu\text{L}$ ) was added to the solution of  $[\text{Mn}^{\text{III}}(\text{L-}t\text{-Bu})(\text{OH})_2]^-$  to convert low-spin  $[\text{Mn}^{\text{III}}(\text{L-}t\text{-Bu})(\text{OH})_2]^-$  to a high-spin  $\text{Mn}^{\text{III}}(\text{L-}t\text{-Bu})(\text{OAc})$  (Figure S10c). As judged from the difference of the  $\mu_{\text{eff}}$  values between the starting  $\text{Mn}^{\text{III}}(\text{L-}t\text{-Bu})(\text{OTf})$  (4.92  $\mu_{\text{B}}$ ) and the recovered  $\text{Mn}^{\text{III}}(\text{L-}t\text{-Bu})(\text{OAc})$  (4.46  $\mu_{\text{B}}$ ), it was estimated that 10 % of high-spin manganese(III) is lost during the reaction with  $\text{Bu}_4\text{NOH}$ . Then, the observed  $\mu_{\text{eff}}$  value of 2.99  $\mu_{\text{B}}$  for  $[\text{Mn}^{\text{III}}(\text{L-}t\text{-Bu})(\text{OH})_2]^-$  may be lower than the true value, but a maximum of 10% error is well within the range for the reliable assignment of the  $S = 1$  state.

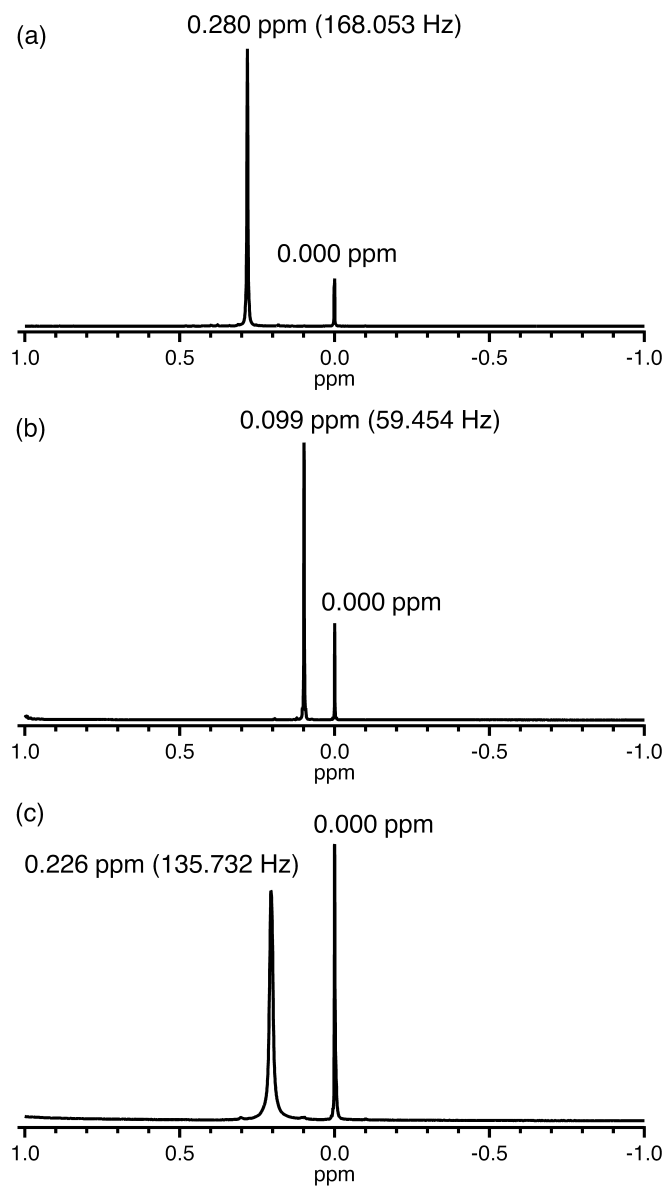

**Figure S10.** 600 MHz  $^1\text{H}$  NMR Evans method experiments for (a)  $\text{Mn}^{\text{III}}(\text{L-}t\text{-Bu})(\text{OTf})$ , (b)  $\text{Mn}^{\text{III}}(\text{L-}t\text{-Bu})(\text{OTf})$  + 3 equiv. of  $\text{Bu}_4\text{NOH}$ , and (c)  $\text{Mn}^{\text{III}}(\text{L-}t\text{-Bu})(\text{OTf})$  + 3 equiv. of  $\text{Bu}_4\text{NOH}$  + 3 equiv. of  $\text{CH}_3\text{CO}_2\text{H}$ . One of the  $^1\text{H}$  NMR signals comes from tetramethylsilane (37 mM) in the presence of a metal complex (5 mM) in  $\text{CD}_3\text{CN}$  at 243 K. The other signal comes from the  $\text{CD}_3\text{CN}$  solution of tetramethylsilane (37 mM) in a coaxial insert.

## References

1. Oehlenschlaeger, K. K.; Mueller, J. O.; Heine, N. B.; Glassner, M.; Guimard, N. K.; Delaittre, G.; Schmidt, F. G.; Barner-Kowollik, C. Light-Induced Modular Ligation of Conventional RAFT Polymers. *Angew. Chem., Int. Ed.* **2013**, *52*, 762-766.
2. Bensari, A.; Zaveri, N. T. Titanium(IV) Chloride-Mediated Ortho-Acylation of Phenols and Naphthols. *Synthesis* **2003**, 267-271.
3. Adhikari, D.; Mossin, S.; Basuli, F.; Huffman, J. C.; Szilagyi, R. K.; Meyer, K.; Mindiola, D. J. Structural, Spectroscopic, and Theoretical Elucidation of a Redox-Active Pincer-Type Ancillary Applied in Catalysis. *J. Am. Chem. Soc.* **2008**, *130*, 3676-3682.
4. Kurahashi, T.; Fujii, H. One-Electron Oxidation of Electronically Diverse Manganese(III) and Nickel(II) Salen Complexes: Transition from Localized to Delocalized Mixed-Valence Ligand Radicals. *J. Am. Chem. Soc.* **2011**, *133*, 8307-8316.
5. Kurahashi, T.; Hada, M.; Fujii, H. Critical Role of External Axial Ligands in Chirality Amplification of *trans*-Cyclohexane-1,2-diamine in Salen Complexes. *J. Am. Chem. Soc.* **2009**, *131*, 12394-12405.
6. Cogan, D. A.; Liu, G.; Kim, K.; Backes, B. J.; Ellman, J. A. Catalytic Asymmetric Oxidation of *tert*-Butyl Disulfide. Synthesis of *tert*-Butanesulfinamides, *tert*-Butyl Sulfoxides, and *tert*-Butanesulfinimines. *J. Am. Chem. Soc.* **1998**, *120*, 8011-8019.
7. Kurahashi, T.; Fujii, H. Comparative Spectroscopic Studies of Iron(III) and Manganese(III) Salen Complexes Having a Weakly Coordinating Triflate Axial Ligand. *Bull. Chem. Soc. Jpn.* **2012**, *85*, 940-947.
8. Schubert, E. M. Utilizing the Evans Method with a Superconducting NMR Spectrometer in the Undergraduate Laboratory. *J. Chem. Educ.* **1992**, *69*, 62-62.
9. Evans, D. F. The Determination of the Paramagnetic Susceptibility of Substances in Solution by Nuclear Magnetic Resonance. *J. Chem. Soc.* **1959**, 2003-2005.
10. Frei, K.; Bernstein, H. J. Method for Determining Magnetic Susceptibilities by NMR. *J. Chem. Phys.* **1962**, *37*, 1891-1892.
11. Bain, G. A.; Berry, J. F. Diamagnetic Corrections and Pascal's Constants. *J. Chem. Educ.* **2008**, *85*, 532-536.



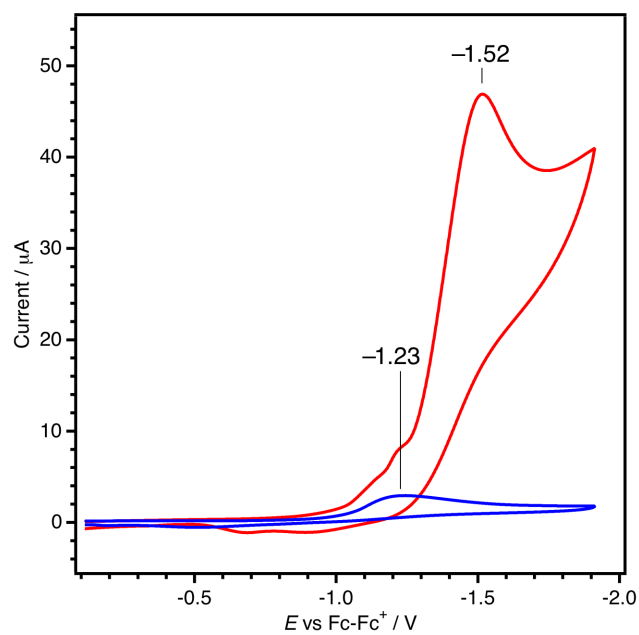

**Figure S11.** Cyclic voltammograms of  $\text{Mn}^{\text{III}}(\text{L-}t\text{-Bu})(\text{OTf})$  in  $\text{CH}_3\text{CH}_2\text{CN}$  containing 0.1 M of  $\text{Bu}_4\text{NOTf}$  at 193 K under Ar (blue line) or under air (red line).

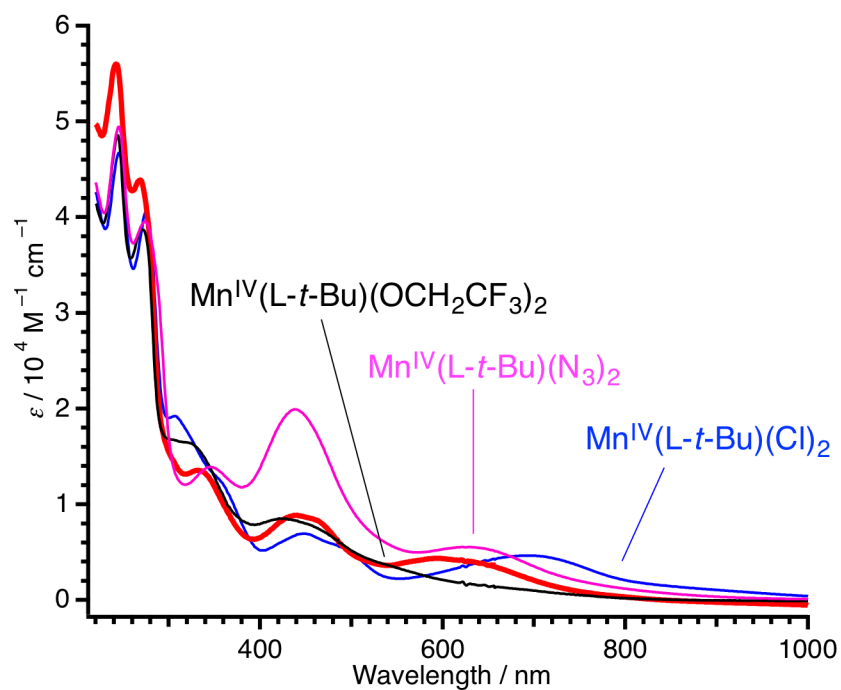

**Figure S12.** Absorption spectrum of the one-electron oxidized product from  $\text{Mn}^{\text{III}}(\text{L-}t\text{-Bu})(\text{OTf}) + 2.5$  equiv. of  $\text{Bu}_4\text{NOH}$  (red bold line), compared with the absorption spectra of  $\text{Mn}^{\text{IV}}(\text{L-}t\text{-Bu})(\text{N}_3)_2$  (magenta line),  $\text{Mn}^{\text{IV}}(\text{L-}t\text{-Bu})(\text{Cl})_2$  (blue line) and  $\text{Mn}^{\text{IV}}(\text{L-}t\text{-Bu})(\text{OCH}_2\text{CF}_3)_2$  (black line). See the following papers for the X-ray structures of  $\text{Mn}^{\text{IV}}(\text{L-}t\text{-Bu})(\text{X})_2$  ( $\text{X} = \text{N}_3, \text{Cl}, \text{and } \text{OCH}_2\text{CF}_3$ ).

Kurahashi, T.; Hada, M.; Fujii, H., *J. Am. Chem. Soc.* **2009**, *131*, 12394-12405.

Kurahashi, T.; Fujii, H., *Inorg. Chem.* **2008**, *47*, 7556-7567.

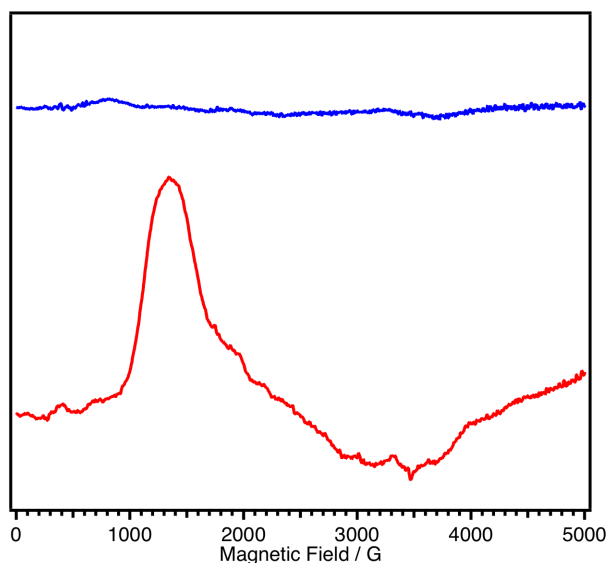

**Figure S13.** X-band EPR spectrum of the starting  $[\text{Mn}^{\text{III}}(\text{L-}t\text{-Bu})(\text{OH})_2]^-$  (blue line) and the one-electron oxidized product from  $[\text{Mn}^{\text{III}}(\text{L-}t\text{-Bu})(\text{OH})_2]^-$  (red line). One-electron oxidation of  $[\text{Mn}^{\text{III}}(\text{L-}t\text{-Bu})(\text{OH})_2]^-$  was carried out electrochemically using a thin-layer electrochemical cell at 193 K. After completion of the electrochemical oxidation as checked by absorption spectroscopy, the product solution (100  $\mu\text{L}$ ) was transferred to an EPR tube using a precooled gastight syringe. Conditions: temperature, 4 K; solvent, frozen  $\text{CH}_3\text{CH}_2\text{CN}$  solution (0.5 mM) containing 0.1 M  $\text{Bu}_4\text{NOTf}$ ; microwave frequency, 9.675 GHz; microwave power, 20 mW; modulation amplitude, 10 G; modulation frequency, 100 kHz; time constant, 163.84 ms; conversion time, 25.72 ms.

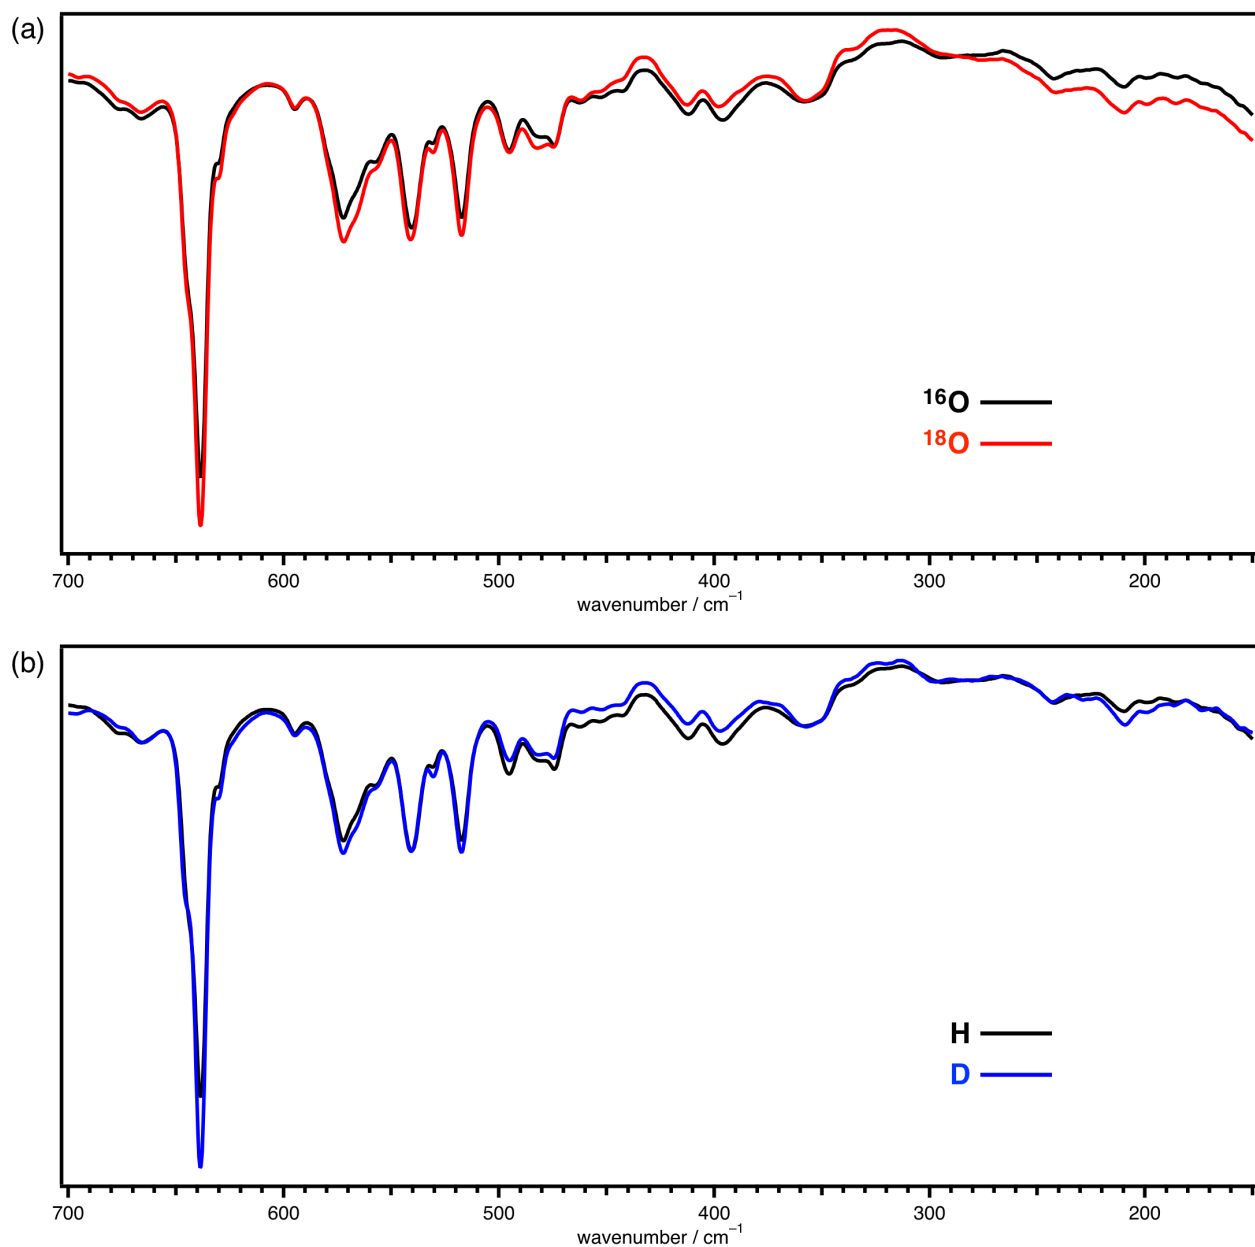

**Figure S14.** Infrared spectra of (a)  $[\text{Mn}^{\text{III}}(\text{L-}t\text{-Bu})(\text{OH})_2]^-$  (black line) /  $[\text{Mn}^{\text{III}}(\text{L-}t\text{-Bu})(^{18}\text{OH})_2]^-$  (red line) and (b)  $[\text{Mn}^{\text{III}}(\text{L-}t\text{-Bu})(\text{OH})_2]^-$  (black line) /  $[\text{Mn}^{\text{III}}(\text{L-}t\text{-Bu})(\text{O}^2\text{H})_2]^-$  (blue line) (CsI disks).

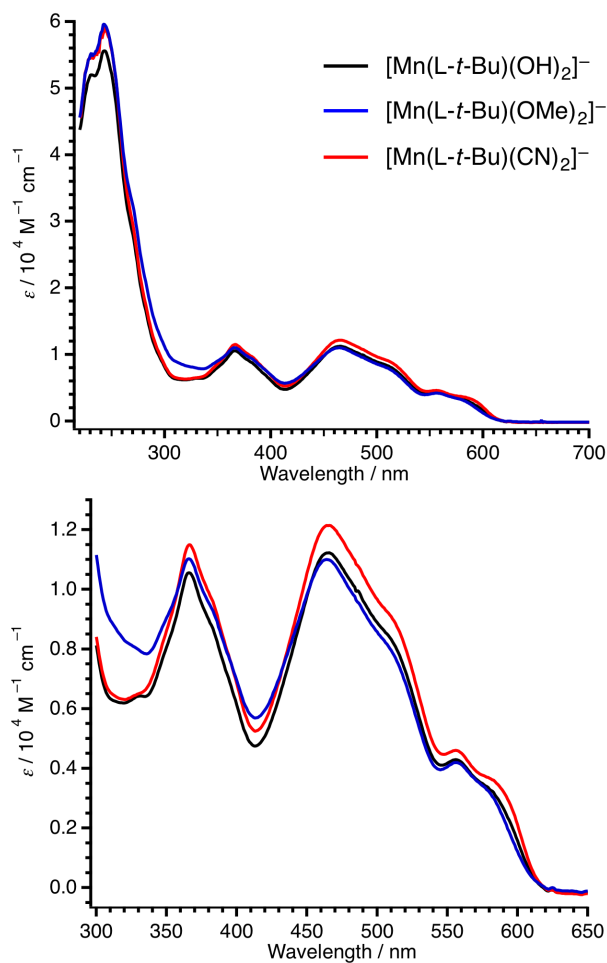

**Figure S15.** Absorption spectra of  $[\text{Mn}^{\text{III}}(\text{L-}t\text{-Bu})(\text{OH})_2]^-$  (black line),  $[\text{Mn}^{\text{III}}(\text{L-}t\text{-Bu})(\text{CN})_2]^-$  (red line) and  $[\text{Mn}^{\text{III}}(\text{L-}t\text{-Bu})(\text{OMe})_2]^-$  (blue line) in  $\text{CH}_3\text{CH}_2\text{CN}$  at 193 K (0.5 mM, 0.1 cm cell). The  $[\text{Mn}^{\text{III}}(\text{L-}t\text{-Bu})(\text{OH})_2]^-$ ,  $[\text{Mn}^{\text{III}}(\text{L-}t\text{-Bu})(\text{CN})_2]^-$  and  $[\text{Mn}^{\text{III}}(\text{L-}t\text{-Bu})(\text{OMe})_2]^-$  complexes were prepared by the reaction of  $\text{Mn}^{\text{III}}(\text{L-}t\text{-Bu})(\text{OTf})$  with  $\text{Bu}_4\text{NOH}$  (2.5 equiv.),  $\text{Bu}_4\text{NCN}$  (2.0 equiv.) and  $\text{Bu}_4\text{NOMe}$  (9.0 equiv.).

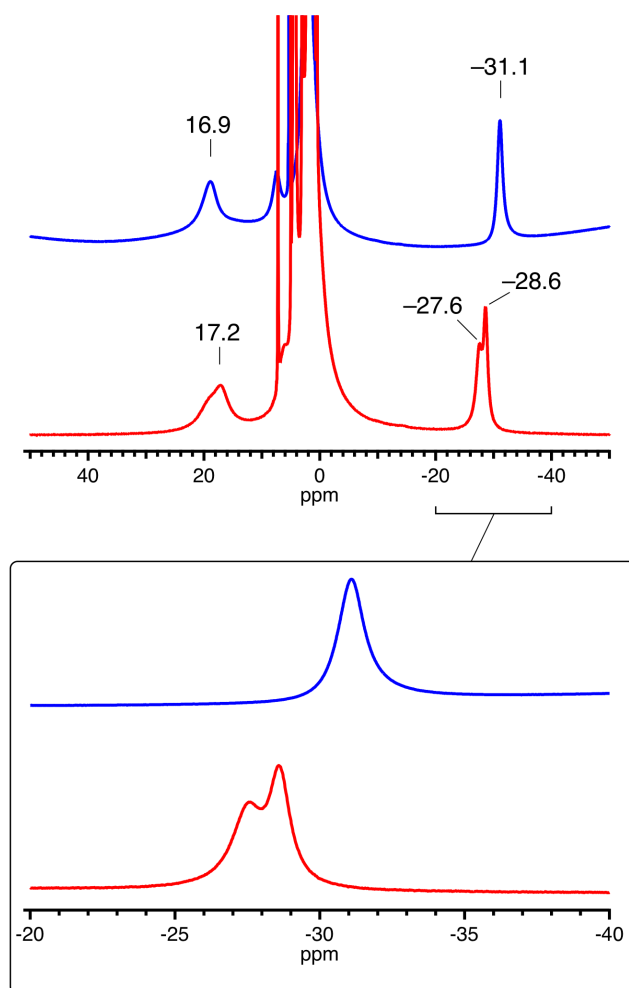

**Figure S16.**  $^1\text{H}$  NMR spectra of  $\text{Mn}^{\text{III}}(\text{L-}t\text{-Bu})(\text{OTf})$  (blue line) and  $\text{Mn}^{\text{III}}(\text{L-}t\text{-Bu})(\text{CN})$  in  $\text{CDCl}_3\text{-CD}_3\text{OD}$  (1 : 1) at 298 K (5 mM).

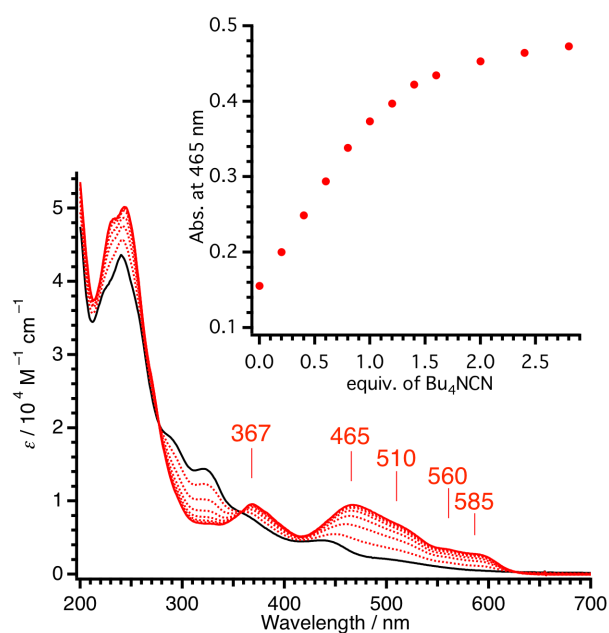

**Figure S17.** Absorption spectral changes of  $\text{Mn}^{\text{III}}(\text{L-}t\text{-Bu})(\text{CN})$  upon the addition of  $\text{Bu}_4\text{NCN}$  (0.4, 0.8, 1.2, 1.6, 2.0, 2.4, 2.8 equiv.) in  $\text{CH}_3\text{CN}$  at room temperature (0.5 mM, 0.1 cm cell). Inset: Plot of the absorbance of the 465-nm band against the equivalents of  $\text{Bu}_4\text{NCN}$ .

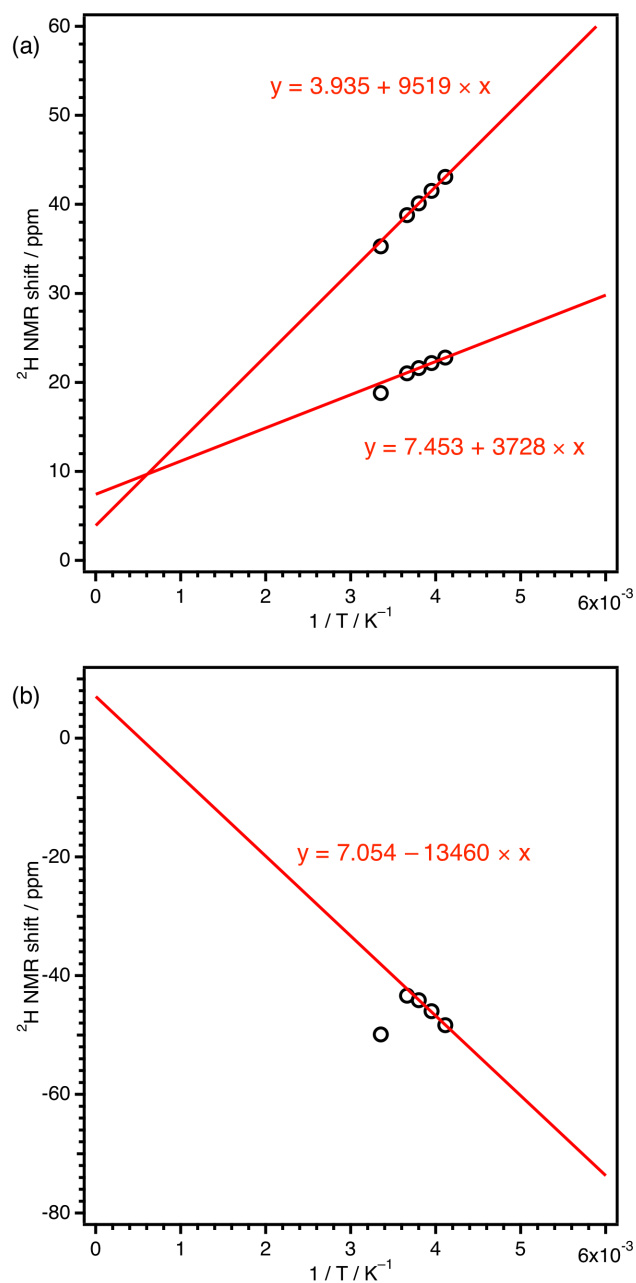

**Figure S18.**  $^2\text{H}$  NMR Curie plots for (a)  $[\text{Mn}^{\text{III}}(\text{L-}t\text{-Bu-}d_4)(\text{CN})_2]^-$  and (b)  $[\text{Mn}^{\text{III}}(\text{L-}t\text{-Bu-}d_2)(\text{CN})_2]^-$  in  $\text{CH}_3\text{CN}$  (5 mM)

and linear least-squares fit to the data obtained at 263, 253 and 243 K.



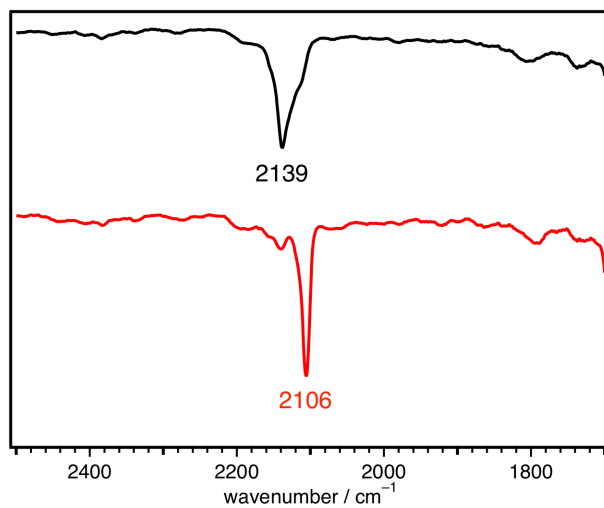

**Figure S19.** Infrared spectra of Mn<sup>III</sup>(L-*t*-Bu)(CN) (black line) and [Mn<sup>III</sup>(L-*t*-Bu)(CN)<sub>2</sub>]<sup>-</sup> (red line) (KBr disks).

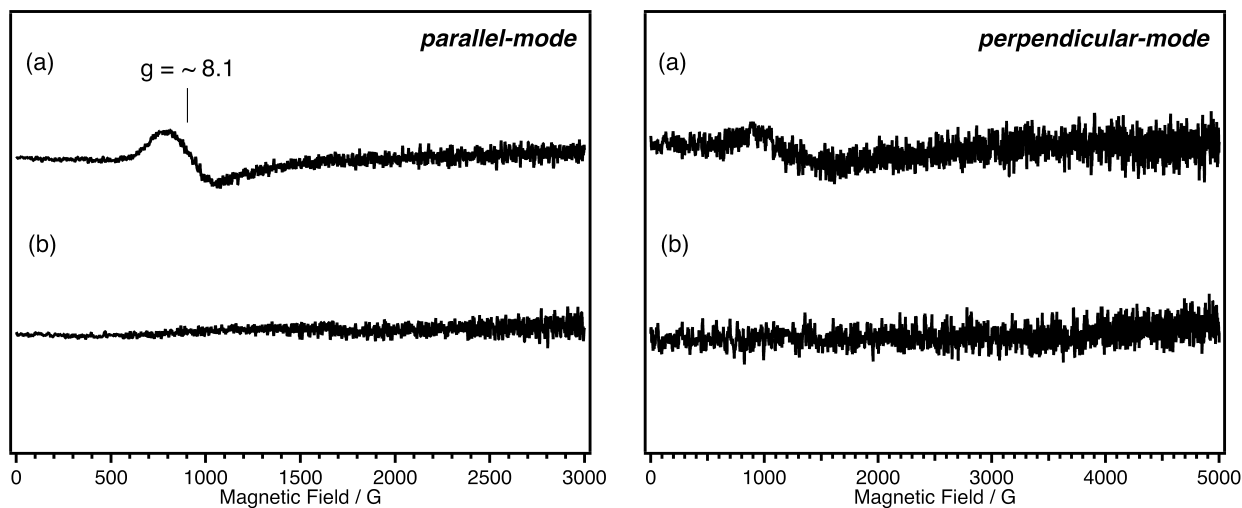

**Figure S20.** X-band EPR spectra of (a)  $\text{Mn}^{\text{III}}(\text{L-}t\text{-Bu})(\text{OTf})$  and (b)  $[\text{Mn}^{\text{III}}(\text{L-}t\text{-Bu})(\text{CN})_2]^-$  (5 mM): (left) parallel mode; (right) perpendicular mode. Conditions: temperature, 4 K; solvent, frozen  $\text{CH}_3\text{CN}$ , microwave frequency, 9.50 (parallel) or 9.68 (perpendicular) GHz; microwave power, 10.0 mW; modulation amplitude, 10 G; modulation frequency, 100 kHz; time constant, 163.84 ms; conversion time, 36.0 ms.

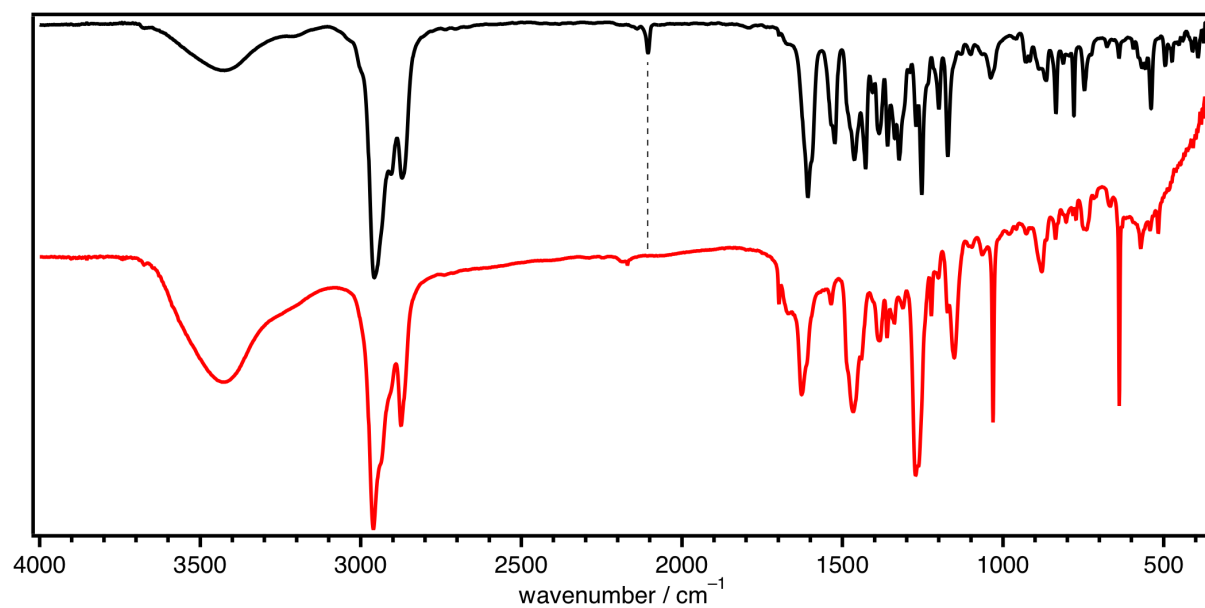

**Figure S21.** Infrared spectra of [Mn<sup>III</sup>(L-*t*-Bu)(CN)<sub>2</sub>]<sup>-</sup> (black line) and [Mn<sup>III</sup>(L-*t*-Bu)(OH)<sub>2</sub>]<sup>-</sup> (red line) (KBr disks).

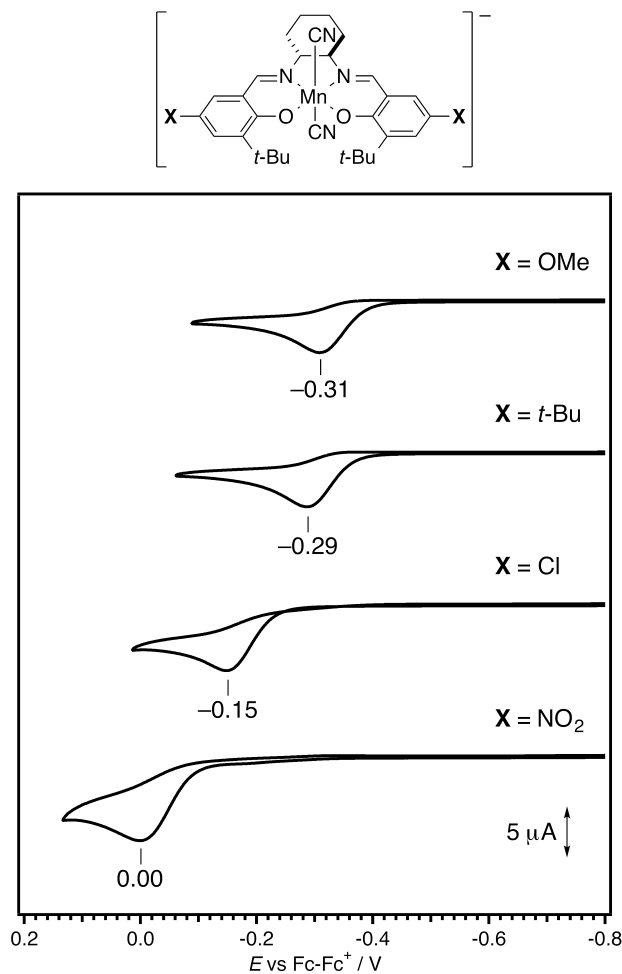

**Figure S22.** Cyclic voltammograms of  $[\text{Mn}^{\text{III}}(\text{L-OMe})(\text{CN})_2]^-$ ,  $[\text{Mn}^{\text{III}}(\text{L-}t\text{-Bu})(\text{CN})_2]^-$ ,  $[\text{Mn}^{\text{III}}(\text{L-Cl})(\text{CN})_2]^-$  and  $[\text{Mn}^{\text{III}}(\text{L-NO}_2)(\text{CN})_2]^-$  in  $\text{CH}_3\text{CN}$  at 243 K under Ar atmosphere. Conditions: 0.1 M of  $\text{Bu}_4\text{NOTf}$  supporting electrolyte, a  $\text{Ag}/\text{Ag}^+$  reference electrode, a glassy-carbon working electrode, a platinum-wire counter electrode, a scan rate of  $50 \text{ mV s}^{-1}$ . The potentials are referenced versus the ferrocene / ferrocenium couple ( $\text{Fc-Fc}^+$ ).

The complete cyclic voltammogram of  $[\text{Mn}^{\text{III}}(\text{L-}t\text{-Bu})(\text{CN})_2]^-$  is shown in the next page. The  $[\text{Mn}^{\text{III}}(\text{L-}t\text{-Bu})(\text{CN})_2]^-$  complex shows a reduction wave at  $-1.33 \text{ V}$  ( $E_c$ ) under Ar atmosphere. But it seems difficult to rule out the possibility that this reduction wave comes from residual  $\text{O}_2$ , because the cyclic voltammetry under aerobic conditions shows a reduction wave at  $-1.35 \text{ V}$  ( $E_c$ ). Then, the  $E_c$  values are not shown in the main text.

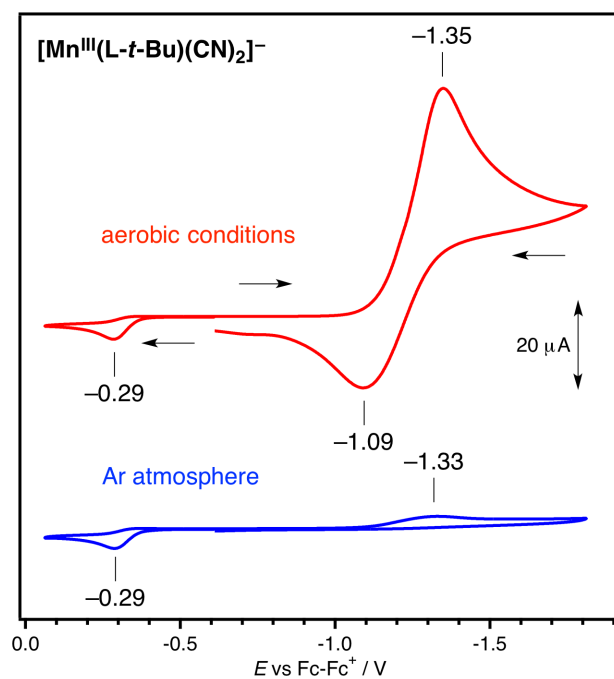

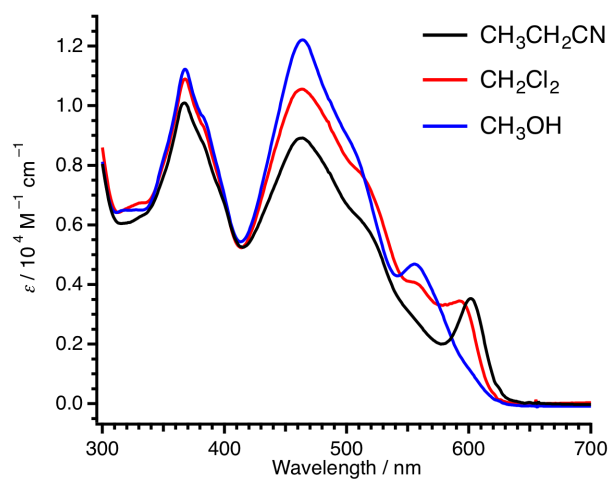

**Figure S23.** Absorption spectra of  $[\text{Mn}^{\text{III}}(\text{L-Cl})(\text{CN})_2]^-$  in  $\text{CH}_3\text{CH}_2\text{CN}$  (black line),  $\text{CH}_2\text{Cl}_2$  (red line) and  $\text{CH}_3\text{OH}$  (blue line) at 193 K (0.5 mM, 0.1 cm cell). The  $[\text{Mn}^{\text{III}}(\text{L-Cl})(\text{CN})_2]^-$  complex was prepared by the reaction of  $\text{Mn}^{\text{III}}(\text{L-Cl})(\text{OTf})$  with 50 equiv. of  $\text{Bu}_4\text{NCN}$ .

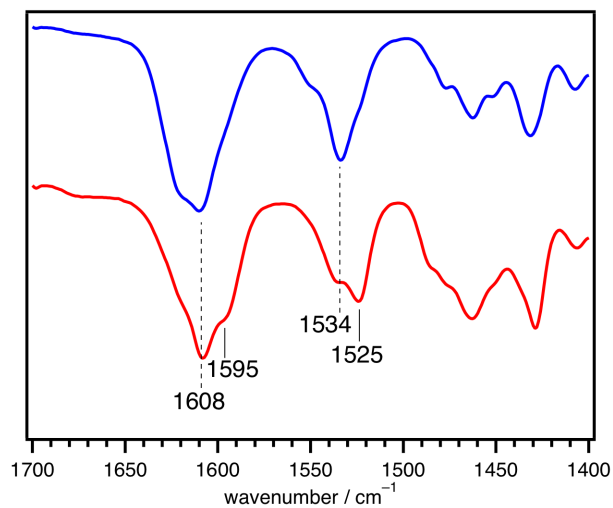

**Figure 24.** Infrared spectra of solid samples of Mn<sup>III</sup>(L-*t*-Bu)(CN) (blue line) and [Mn<sup>III</sup>(L-*t*-Bu)(CN)<sub>2</sub>]<sup>-</sup> (red line) (KBr disks).
